# Supplementary material for: Synthesis and Structure of the Bis- and Tris-Polyhedral Hybrid Carboranoclathrochelates with Functionalizing Biorelevant Substituents—The Derivatives of Propargylamine Iron(II) Clathrochelates with Terminal Triple C≡C Bond(s)
Source: MDPI journal article supplement (doi:10.3390/molecules26123635), 2021-06-14
Supplement: s1 [file s1]

Supplementary Materials

for

**Synthesis and Structure of the Bis- and Tris-Polyhedral Hybrid  
Carboranoclathrochelates with Functionalizing Biorelevant Substituents—the  
Derivatives of Propargylamine Iron(II) Clathrochelates with Terminal Triple C≡C  
Bond(s)**

Genrikh E. Zelinskii,<sup>1,2</sup> Ilya P. Limarev,<sup>1,2</sup> Anna V. Vologzhanina,<sup>2</sup> Valentina A. Olshevskaya,<sup>2</sup> Anton V. Makarenkov,<sup>2</sup> Pavel V. Dorovatovskii,<sup>3</sup> Alexander S. Chuprin,<sup>2</sup> Mikhail A. Vershinin,<sup>4</sup> Semyon V. Dudkin<sup>2</sup> and Yan Z. Voloshin<sup>1,2\*</sup>

<sup>1</sup>*Kurnakov Institute of General and Inorganic Chemistry  
of the Russian Academy of Sciences, 31 Leninsky prosp., 119991 Moscow, Russia*

<sup>2</sup>*Nesmeyanov Institute of Organoelement Compounds  
of the Russian Academy of Sciences, 28 Vavilova st., 119991 Moscow, Russia*

<sup>3</sup>*National Research Center Kurchatov Institute,  
1 Kurchatova pl., 123098 Moscow, Russia*

<sup>4</sup>*Nikolaev Institute of Inorganic Chemistry  
of the Siberian Branch of the Russian Academy of Sciences,  
3 Lavrentieva prosp., 630090 Novosibirsk, Russia*

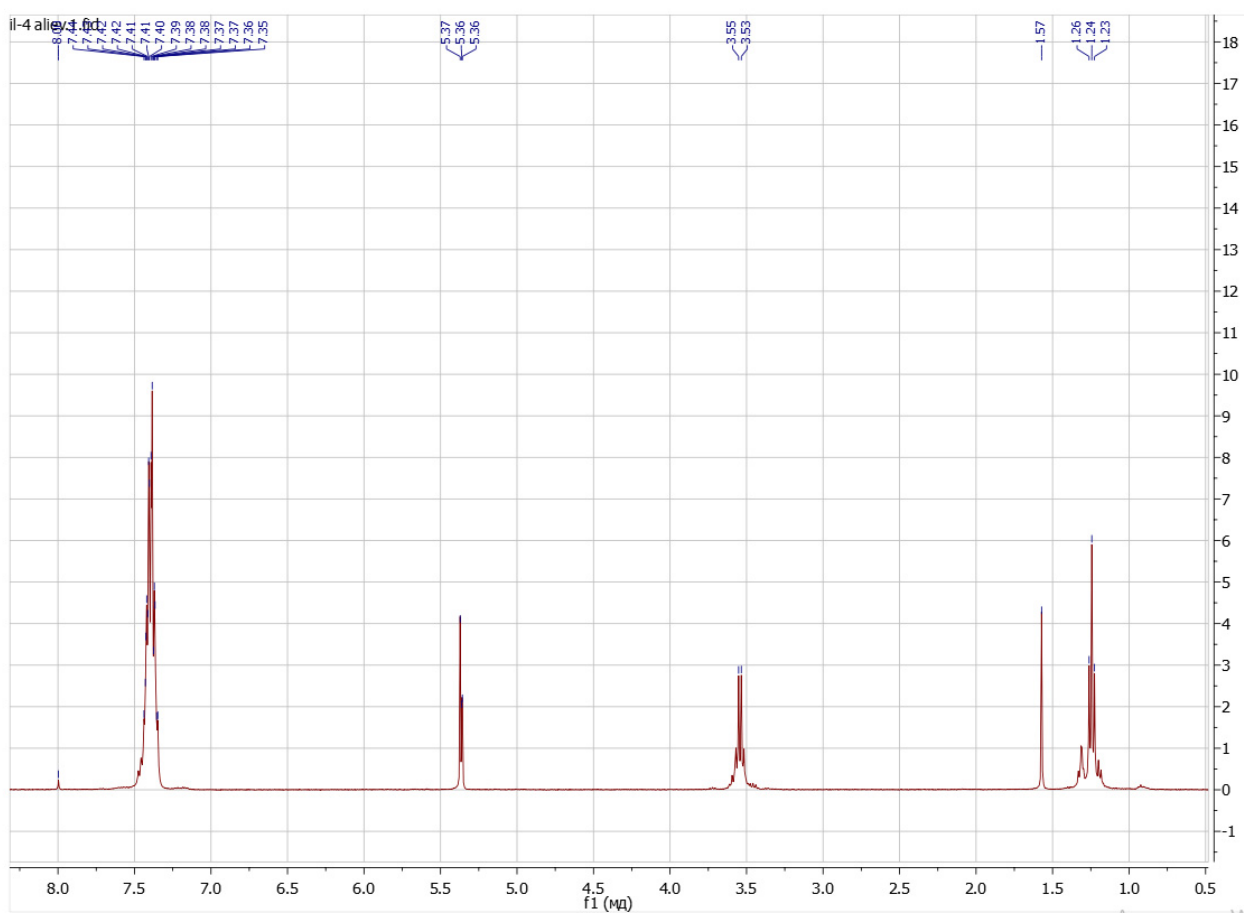

**Figure S1.**  $^1\text{H}$  NMR spectrum of the clathrochelate precursor  $\text{FeBd}_2(\text{ClGmDea})(\text{BF})_2$  (400.13 MHz,  $\text{CD}_2\text{Cl}_2$ ,  $20^\circ\text{C}$ ).

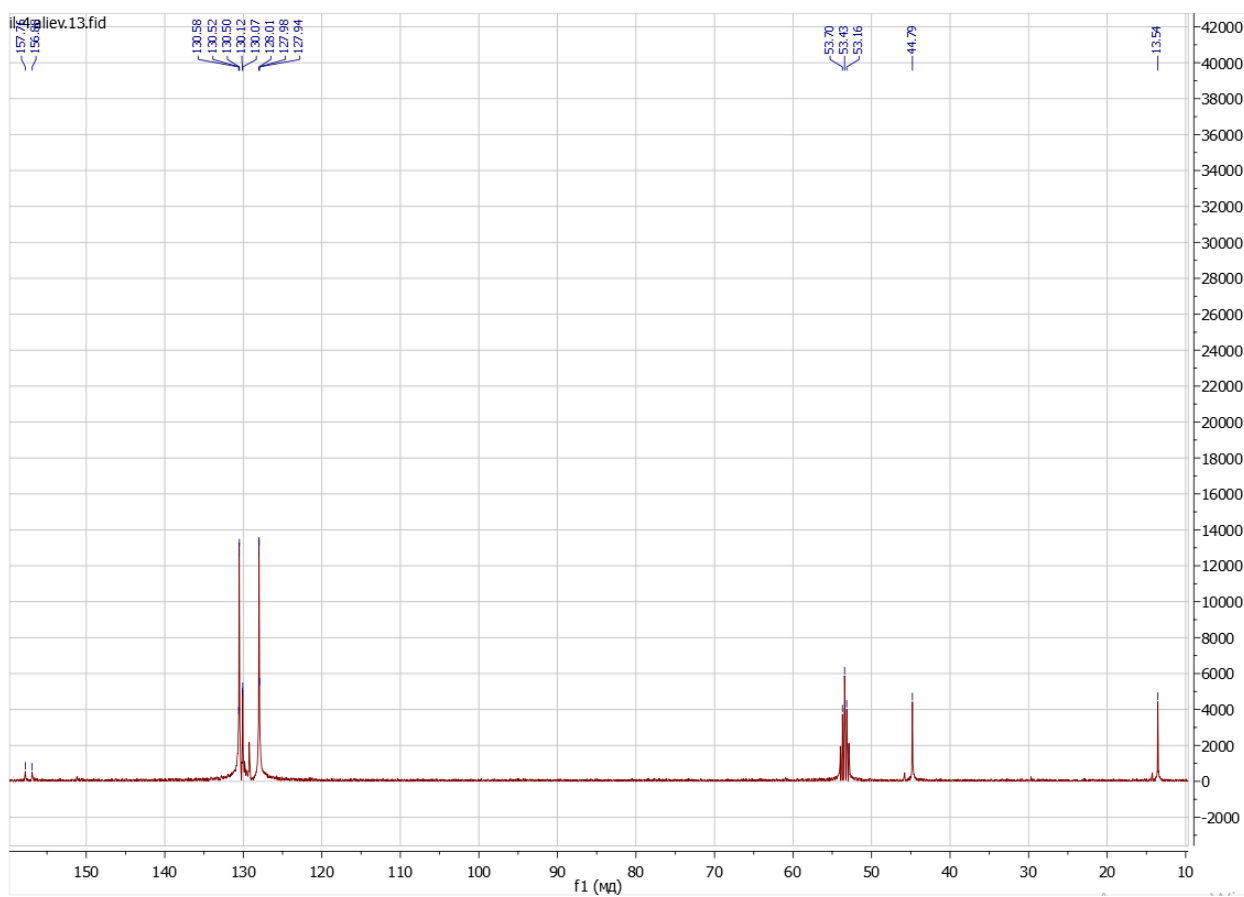

**Figure S2.**  $^{13}\text{C}\{^1\text{H}\}$  NMR spectrum of the clathrochelate precursor  $\text{FeBd}_2(\text{ClGmDea})(\text{BF})_2$  (400.13 MHz,  $\text{CD}_2\text{Cl}_2$ , 20°C).

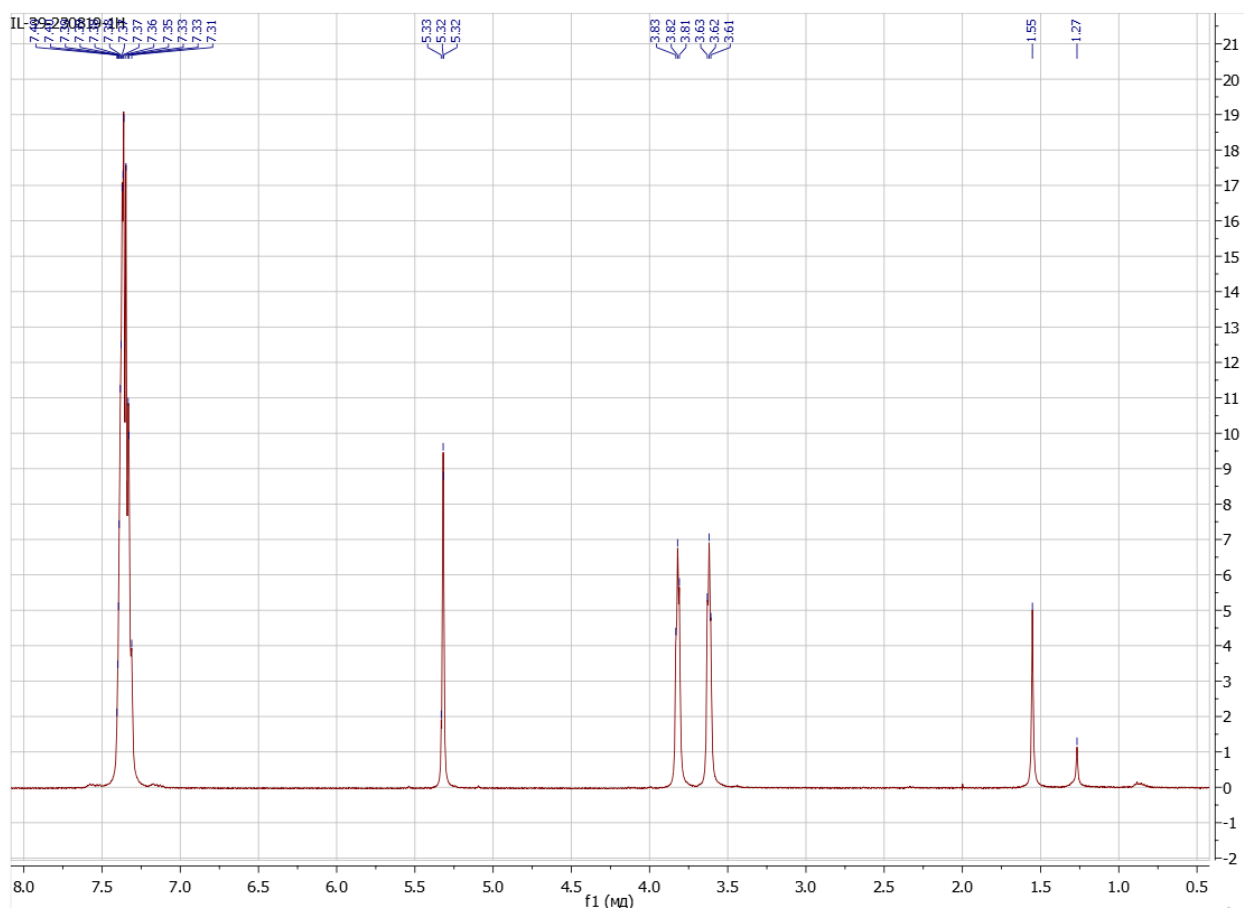

**Figure S3.**  $^1\text{H}$  NMR spectrum of the clathrochelate precursor  $\text{FeBd}_2(\text{ClGmMorph})(\text{BF})_2$  (400.13 MHz,  $\text{CD}_2\text{Cl}_2$ ,  $20^\circ\text{C}$ ).

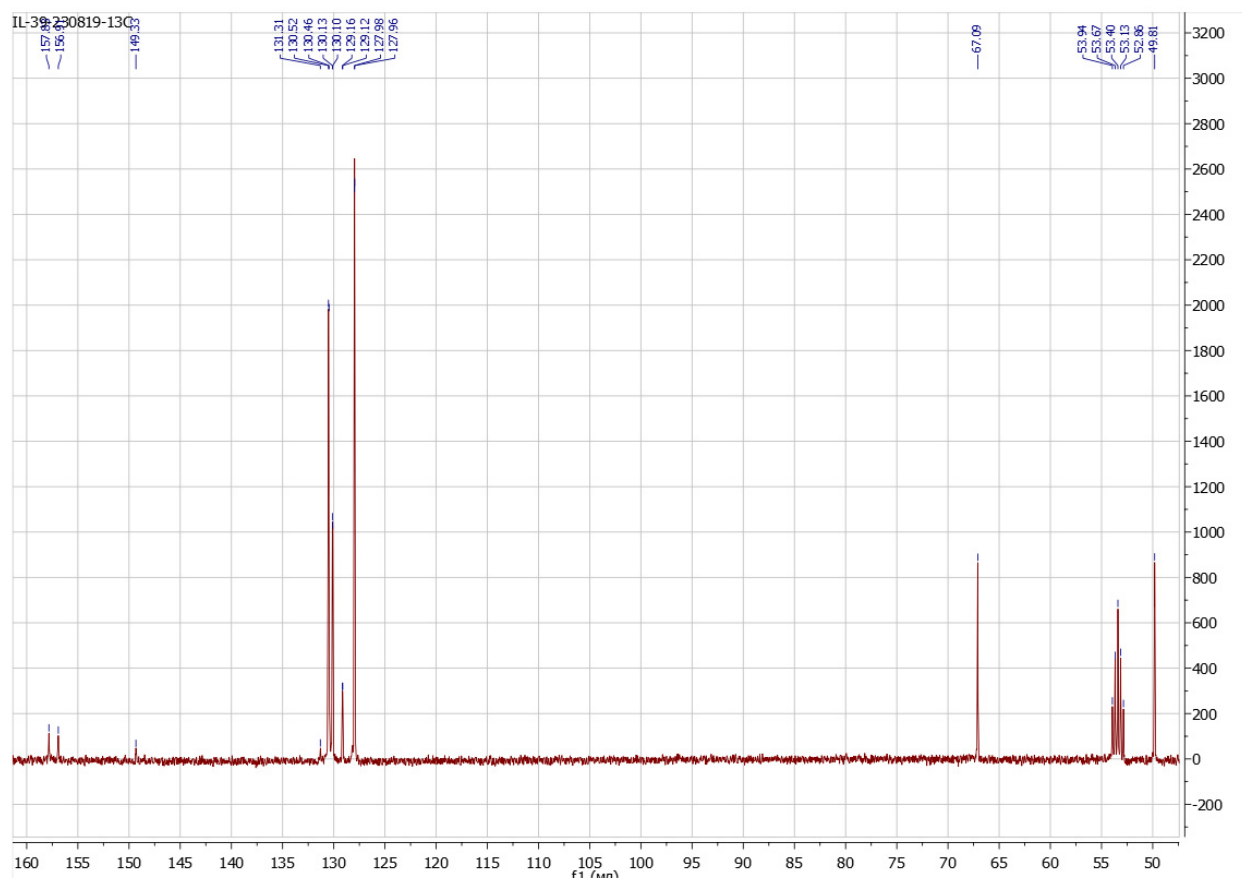

**Figure S4.**  $^{13}\text{C}\{^1\text{H}\}$  NMR spectrum of the clathrochelate precursor  $\text{FeBd}_2(\text{ClGmMorph})(\text{BF})_2$  (400.13 MHz,  $\text{CD}_2\text{Cl}_2$ , 20°C).

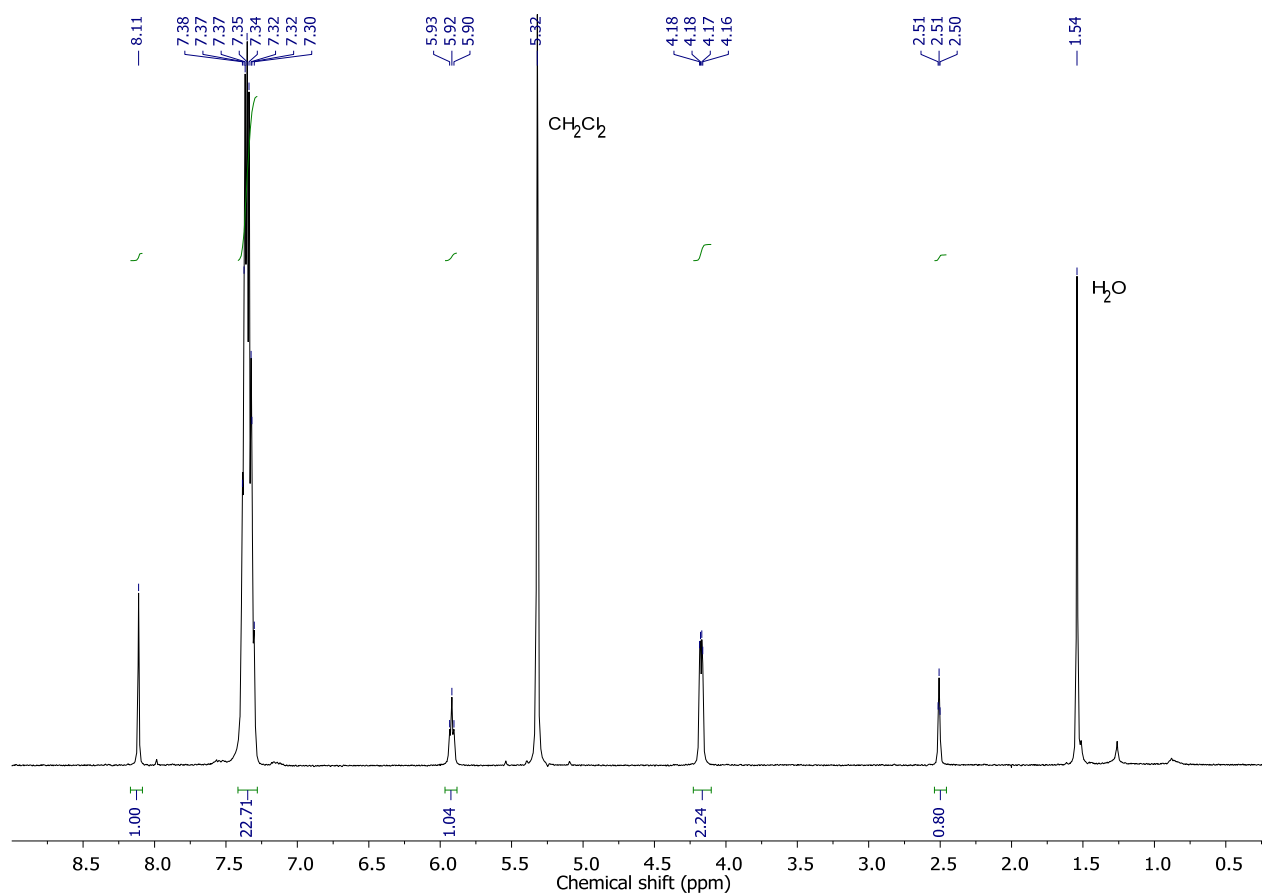

**Figure S5.**  $^1\text{H}$  NMR spectrum of the clathrochelate  $\text{FeBd}_2(\text{HGmProp})(\text{BF})_2$  (400.13 MHz,  $\text{CD}_2\text{Cl}_2$ ,  $20^\circ\text{C}$ ).

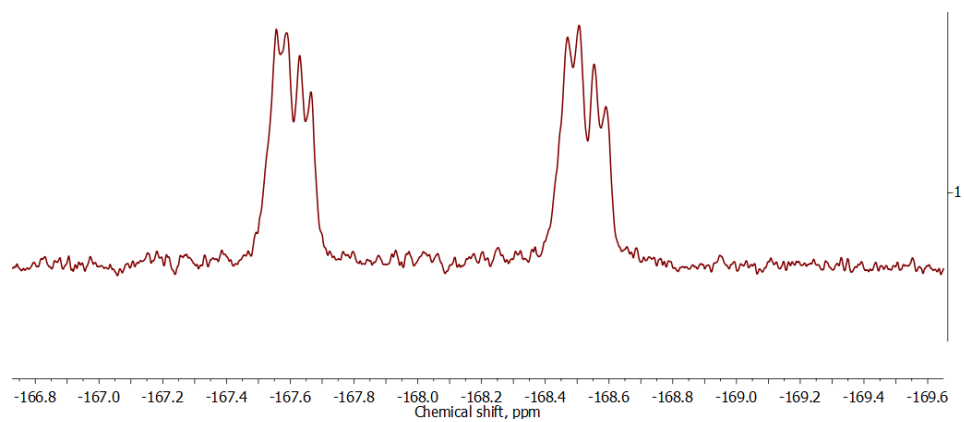

**Figure S6.**  $^{19}\text{F}\{^1\text{H}\}$  NMR spectrum of the carboranoclathrochelate complex  $\text{FeBd}_2(\text{HGmProp})(\text{BF})_2$

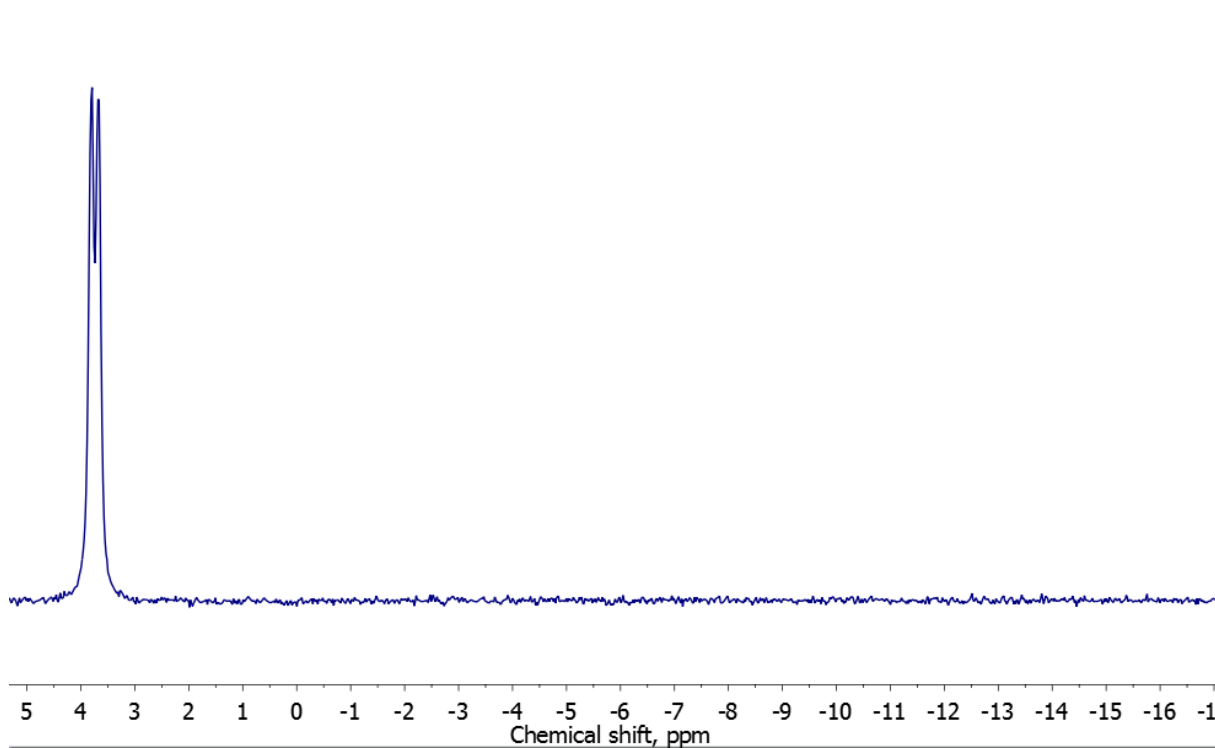

**Figure S7.**  $^{11}\text{B}\{^1\text{H}\}$  NMR spectrum of the clathrochelate  $\text{FeBd}_2(\text{HGmProp})(\text{BF})_2$ .



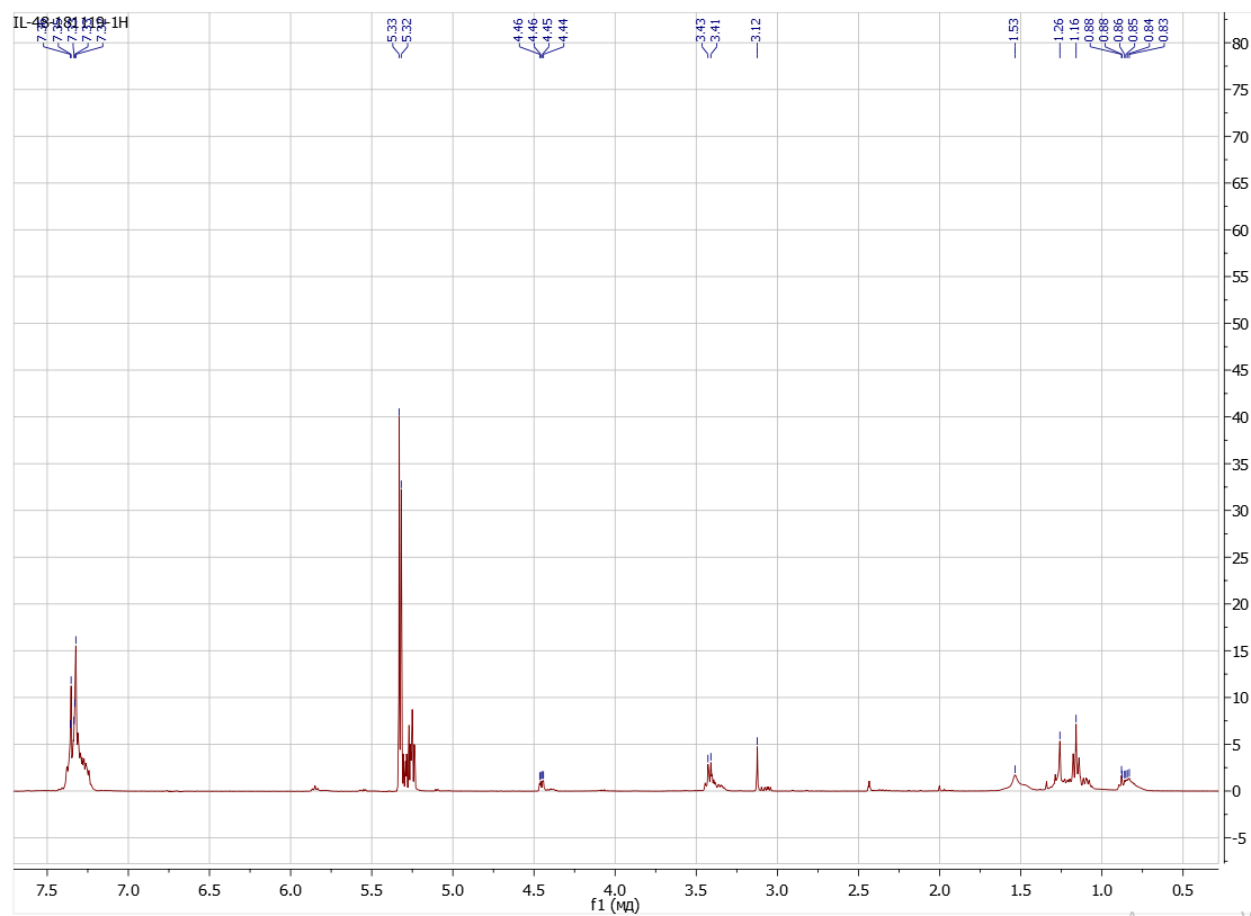

**Figure S8.**  $^1\text{H}$  NMR spectrum of the complex  $\text{FeBd}_2(\text{PropGmDea})(\text{BF})_2$  (400.13 MHz,  $\text{CD}_2\text{Cl}_2$ ,  $20^\circ\text{C}$ ).

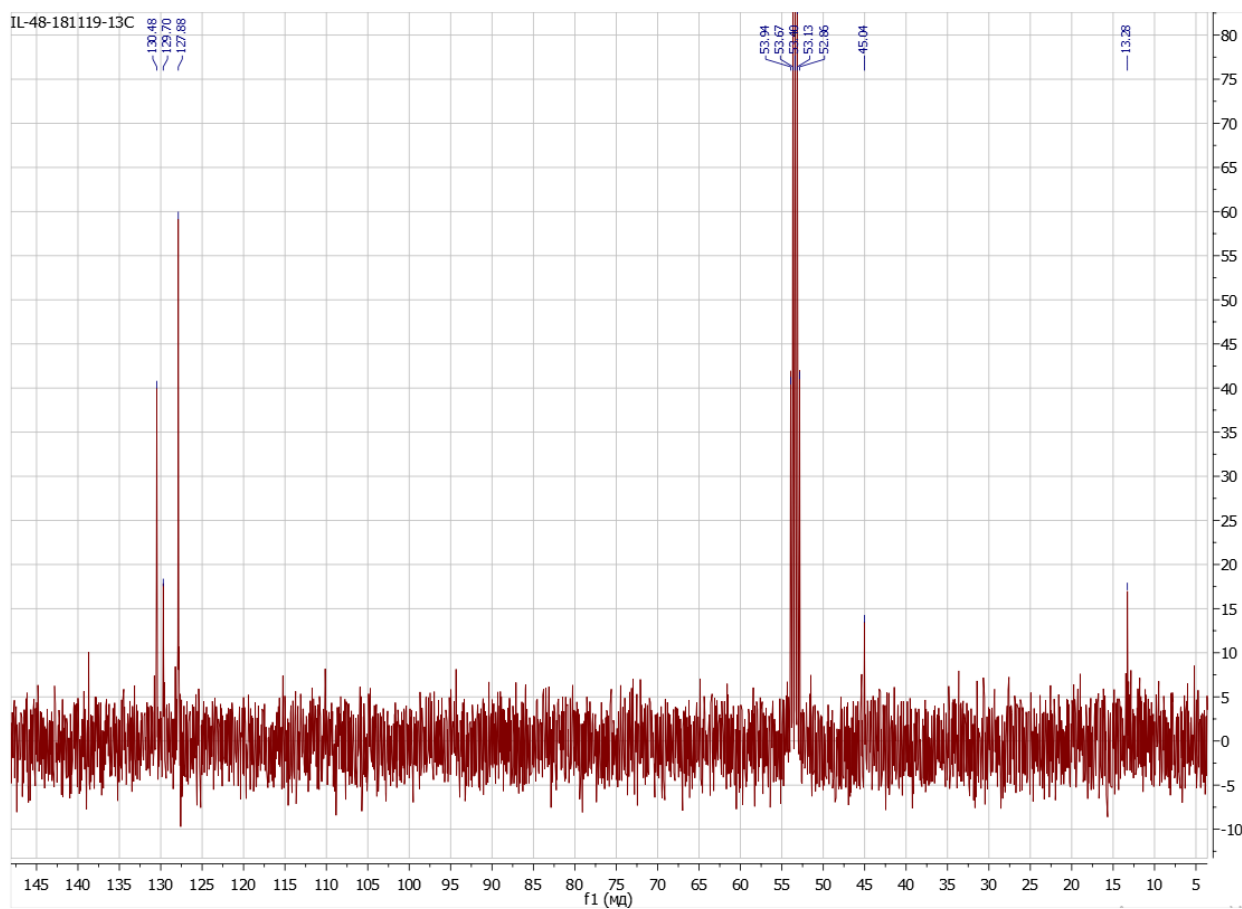

**Figure S9.**  $^{13}\text{C}\{^1\text{H}\}$  NMR spectrum of the complex  $\text{FeBd}_2(\text{PropGmDea})(\text{BF})_2$  (400.13 MHz,  $\text{CD}_2\text{Cl}_2$ ,  $20^\circ\text{C}$ ).

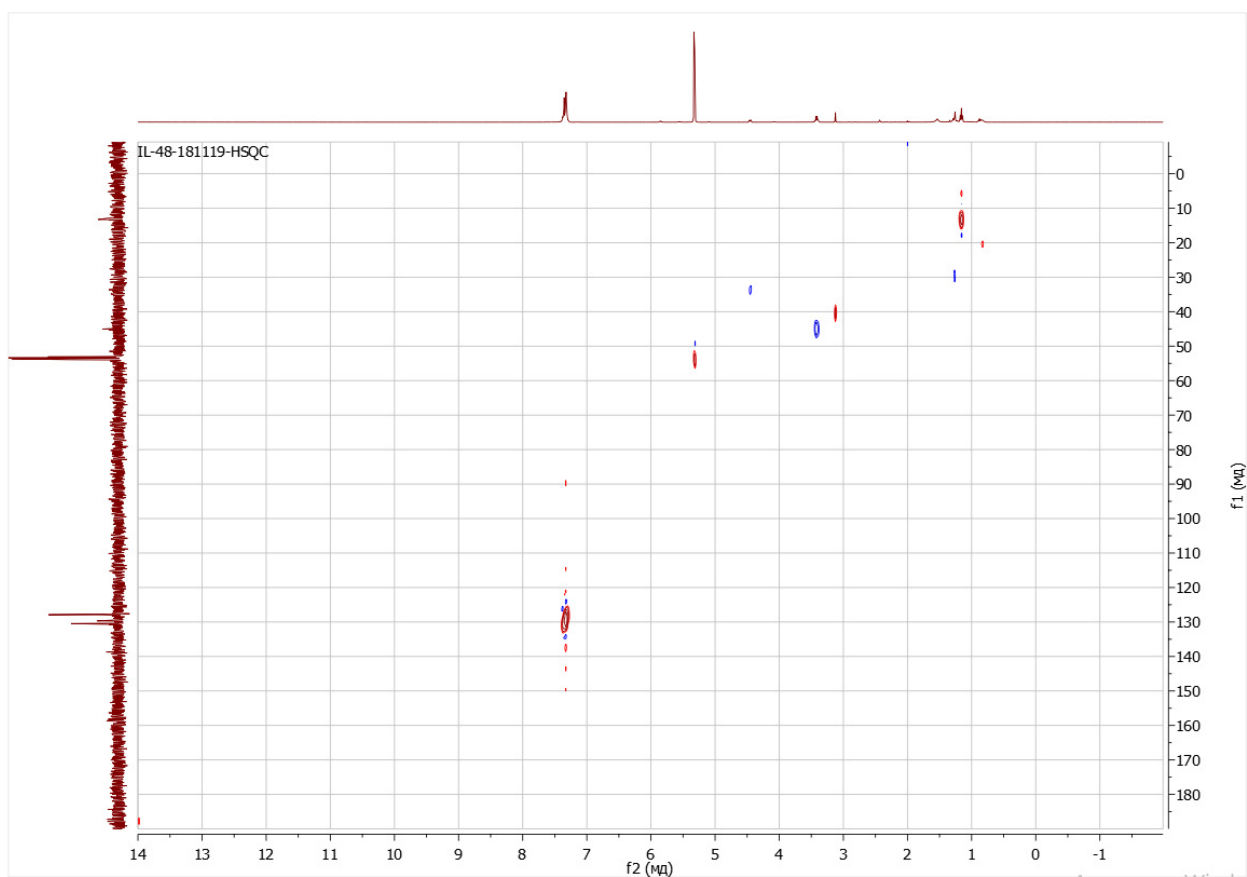

**Figure S10.** 2D HSQC NMR spectrum of the complex  $\text{FeBd}_2(\text{PropGmDea})(\text{BF})_2$  (400.13 MHz,  $\text{CD}_2\text{Cl}_2$ , 20°C).

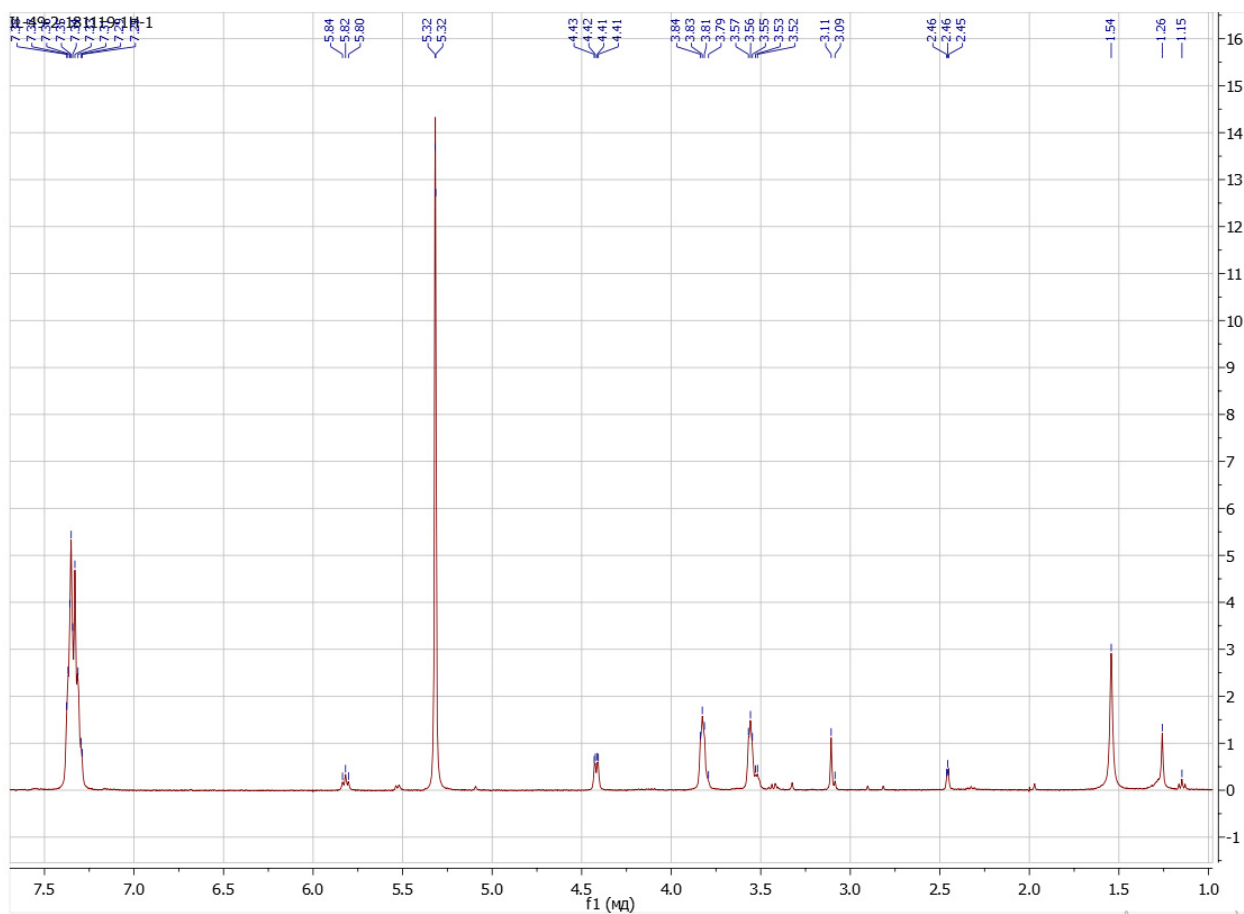

**Figure S11.**  $^1\text{H}$  NMR spectrum of the complex  $\text{FeBd}_2(\text{PropGmMorph})(\text{BF})_2$  (400.13 MHz,  $\text{CD}_2\text{Cl}_2$ ,  $20^\circ\text{C}$ ).

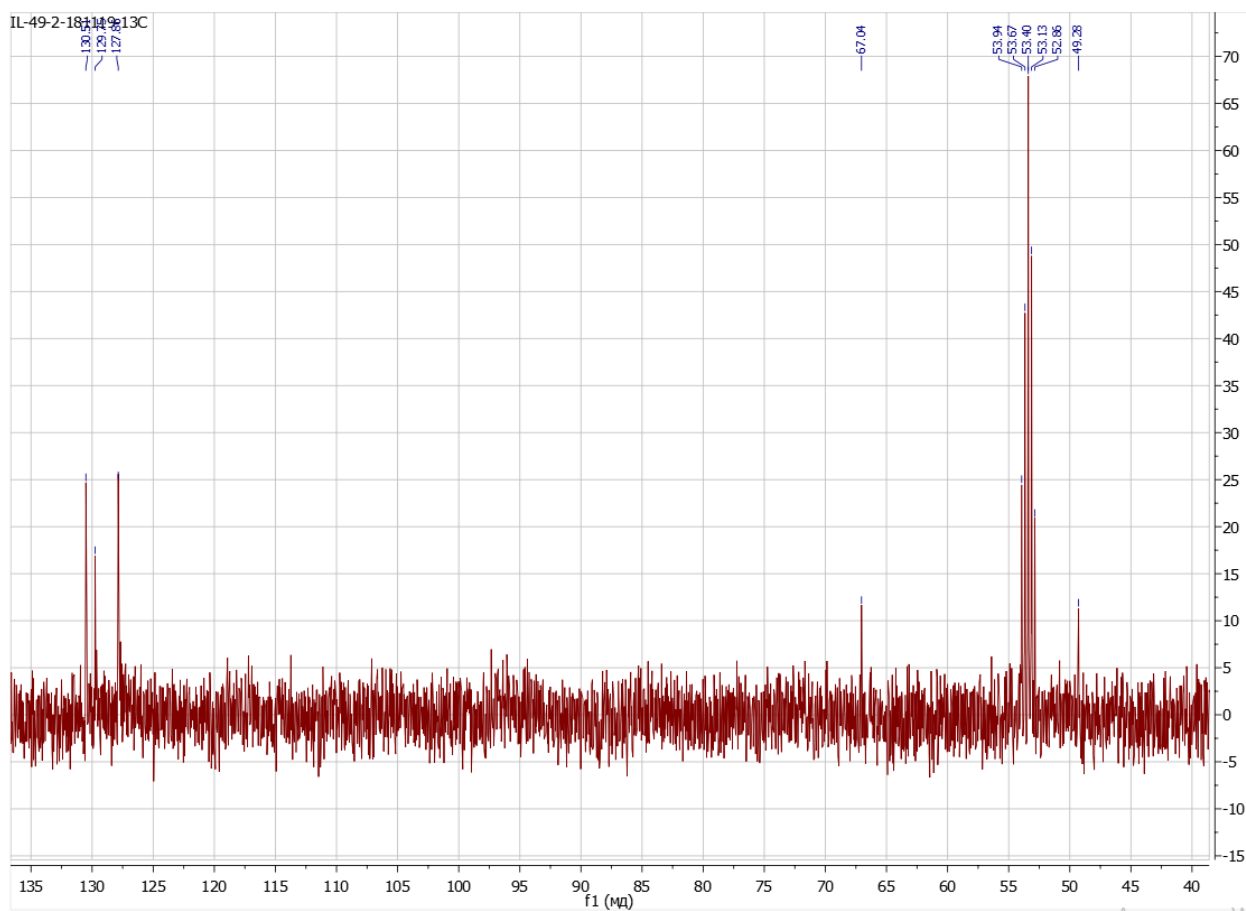

**Figure S12.**  $^{13}\text{C}\{^1\text{H}\}$  NMR spectrum of the complex  $\text{FeBd}_2(\text{PropGmMorph})(\text{BF})_2$  (400.13 MHz,  $\text{CD}_2\text{Cl}_2$ ,  $20^\circ\text{C}$ ).

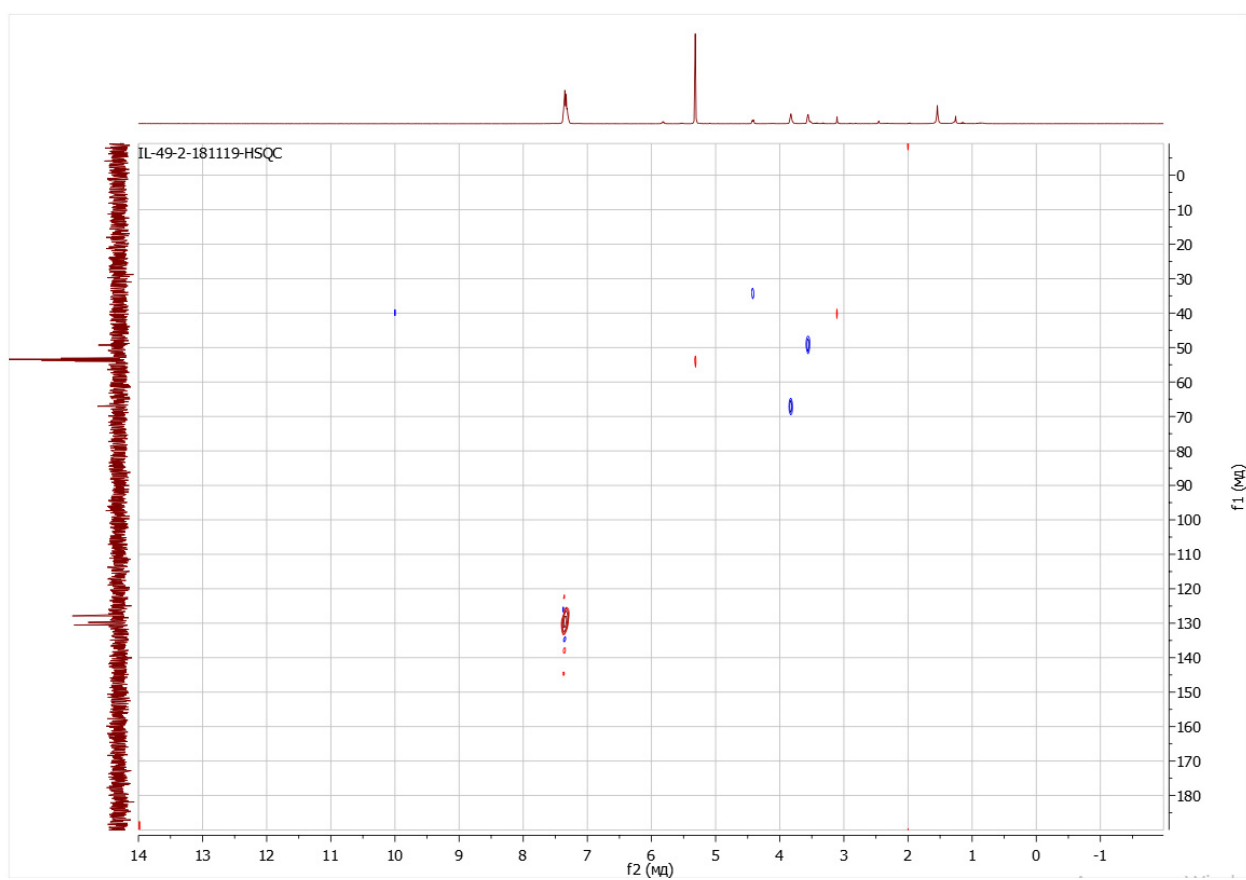

**Figure S13.** 2D HSQC NMR spectrum of the complex  $\text{FeBd}_2(\text{PropGmMorph})(\text{BF})_2$  (400.13 MHz,  $\text{CD}_2\text{Cl}_2$ , 20°C).

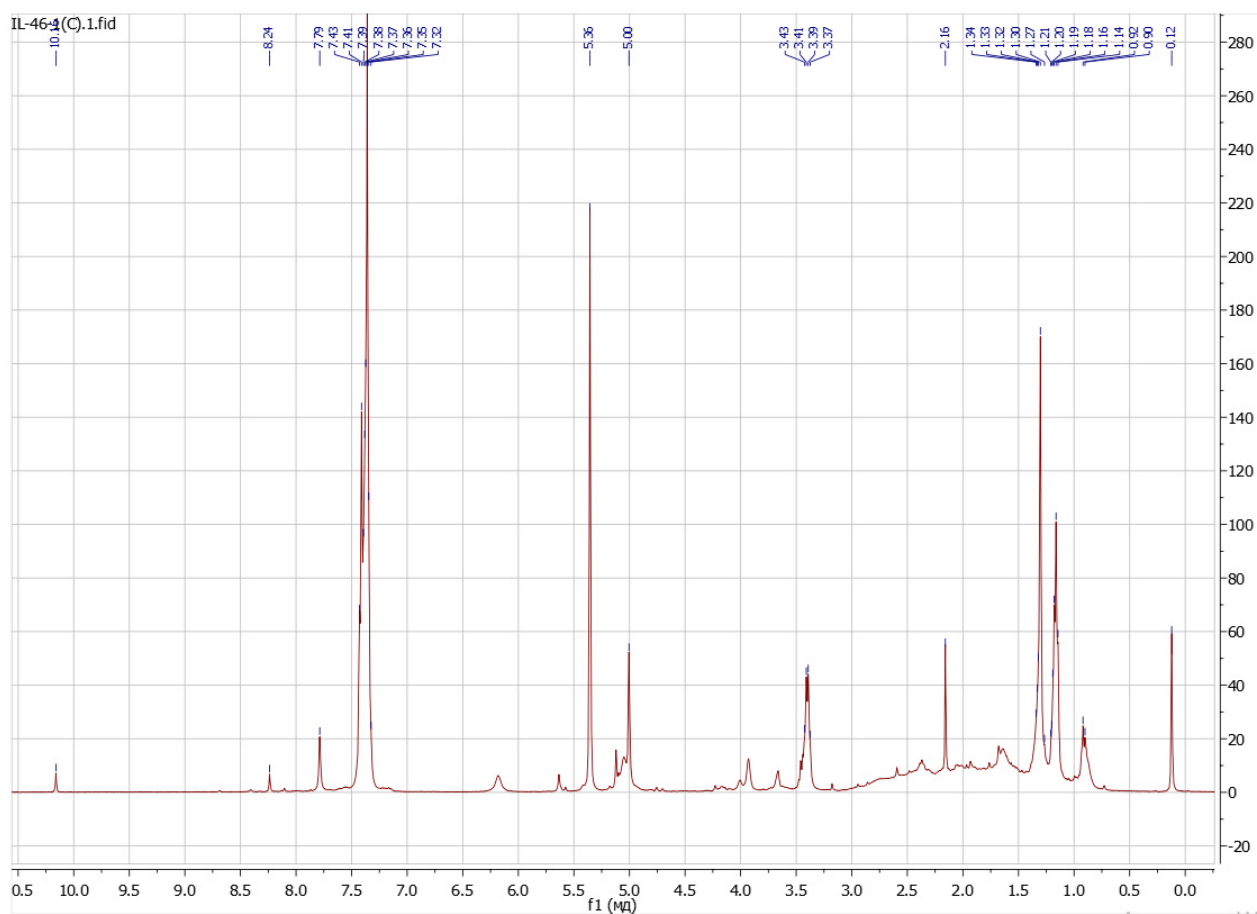

**Figure S14.** <sup>1</sup>H NMR spectrum of the carboranoclathrochelate FeBd<sub>2</sub>(DeaGmSpCarb)(BF)<sub>2</sub> (400.13 MHz, CD<sub>2</sub>Cl<sub>2</sub>, 20°C).

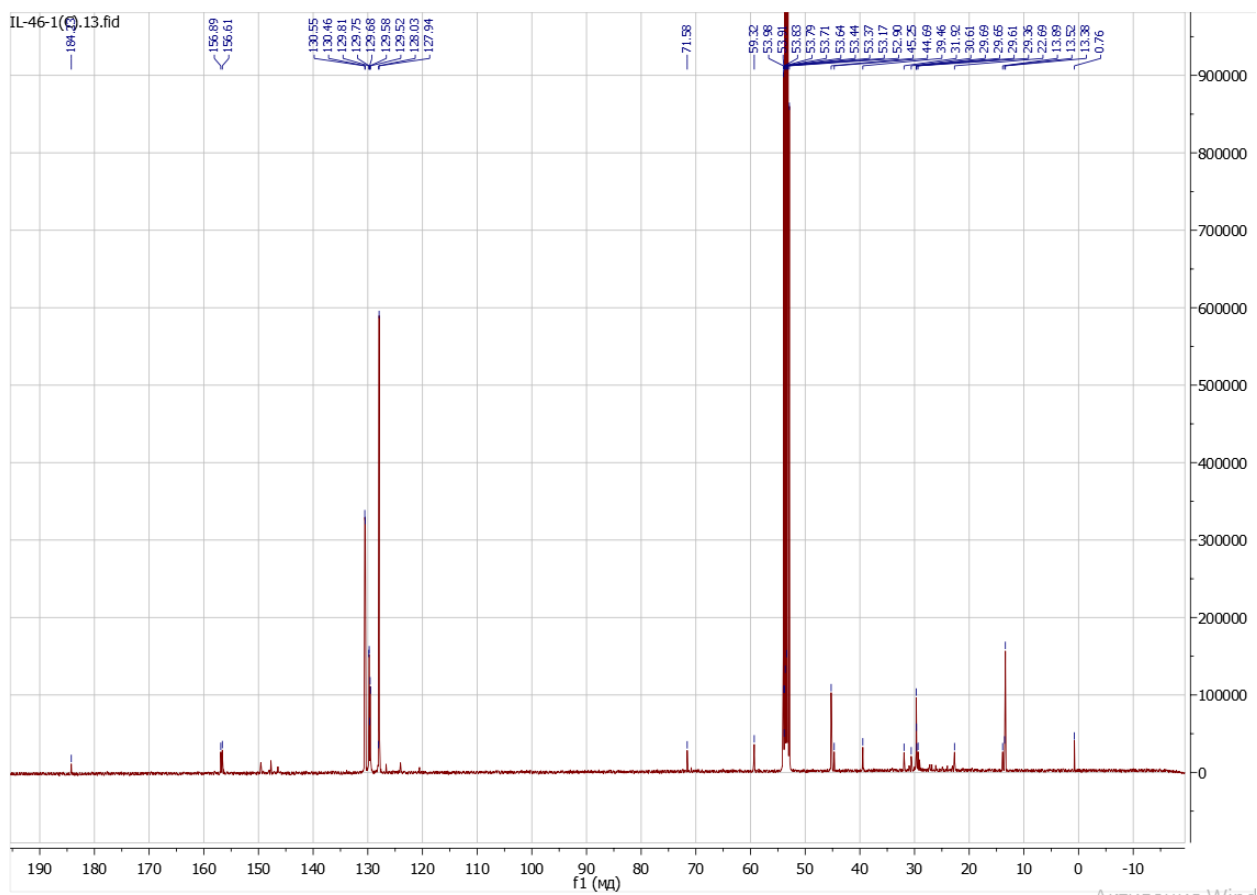

**Figure S15.**  $^{13}\text{C}\{^1\text{H}\}$  NMR spectrum of the carboranoclathrochelate  $\text{FeBd}_2(\text{DeaGmSpCarb})(\text{BF})_2$  (400.13 MHz,  $\text{CD}_2\text{Cl}_2$ ,  $20^\circ\text{C}$ ).



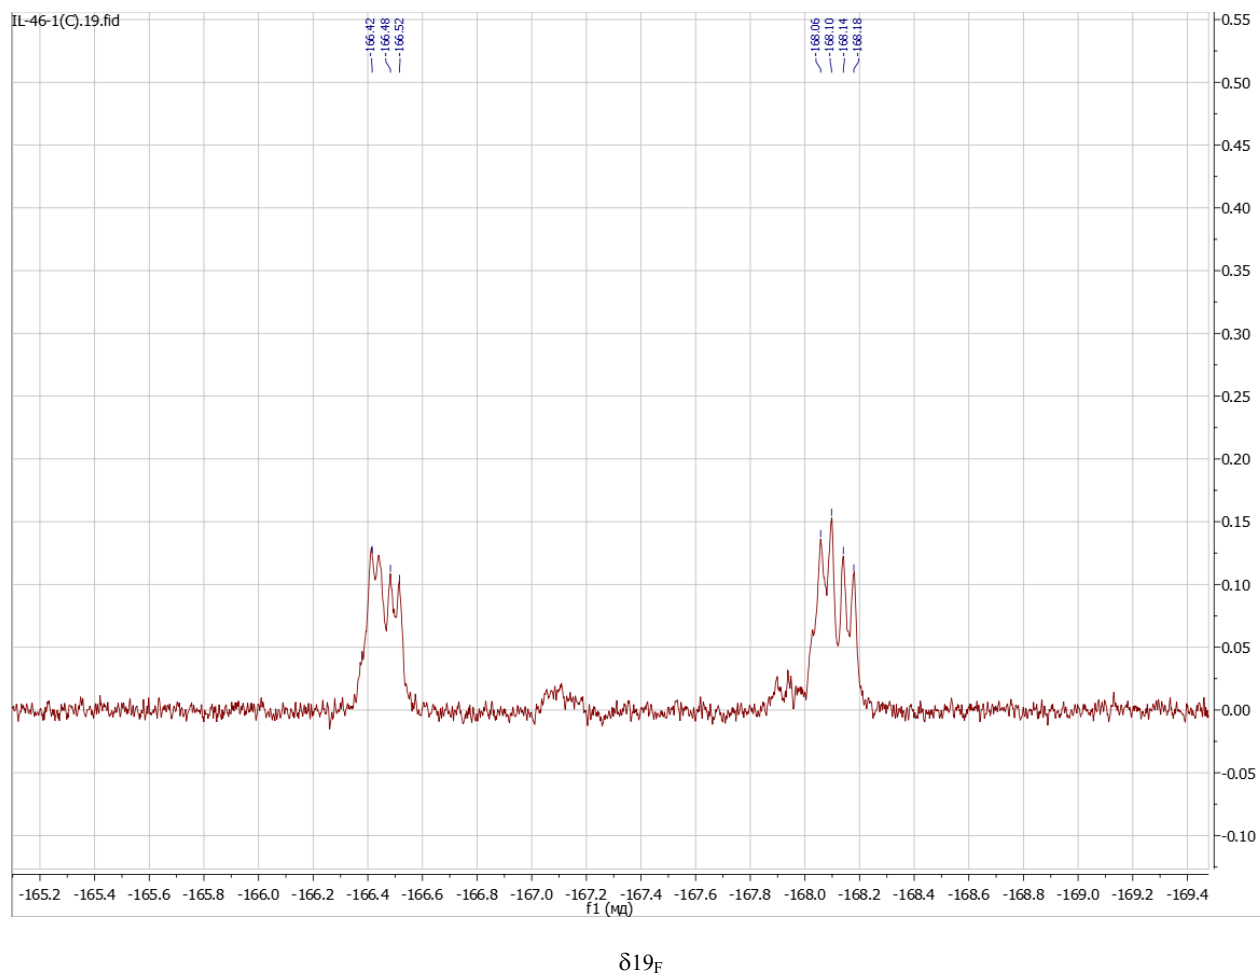

**Figure S16.** Fragment of  $^{19}\text{F}\{^1\text{H}\}$  NMR spectrum of the carboranoclathrocholate  $\text{FeBd}_2(\text{DeaGmSpCarb})(\text{BF})_2$  (400.13 MHz,  $\text{CD}_2\text{Cl}_2$ , 20°C).

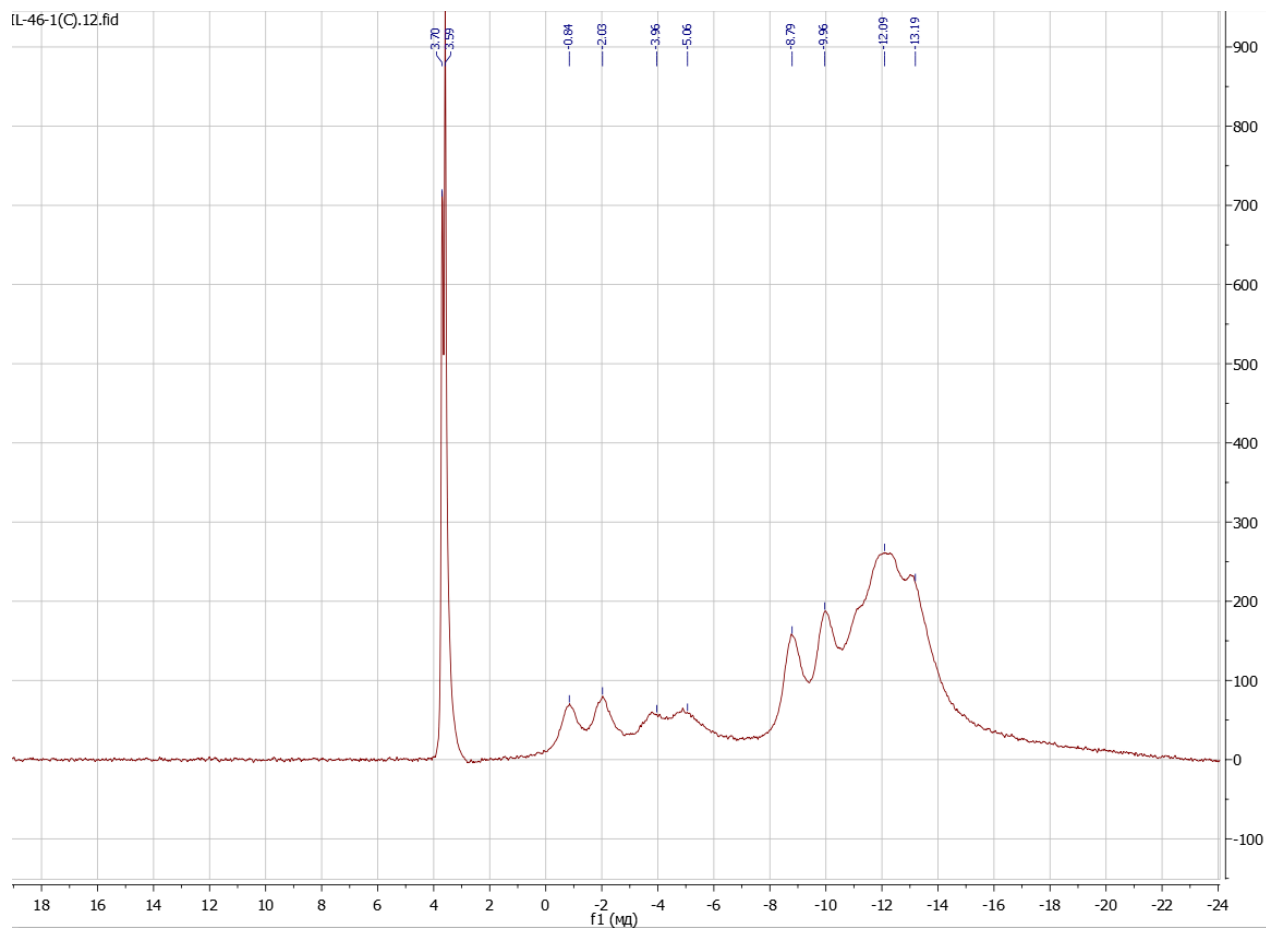

**Figure S17.** Fragment of the  $^{11}\text{B}\{^1\text{H}\}$  NMR spectrum of the carboranoclathrochelate  $\text{FeBd}_2(\text{DeaGmSpCarb})(\text{BF})_2$  (400.13 MHz,  $\text{CD}_2\text{Cl}_2$ ,  $20^\circ\text{C}$ ).

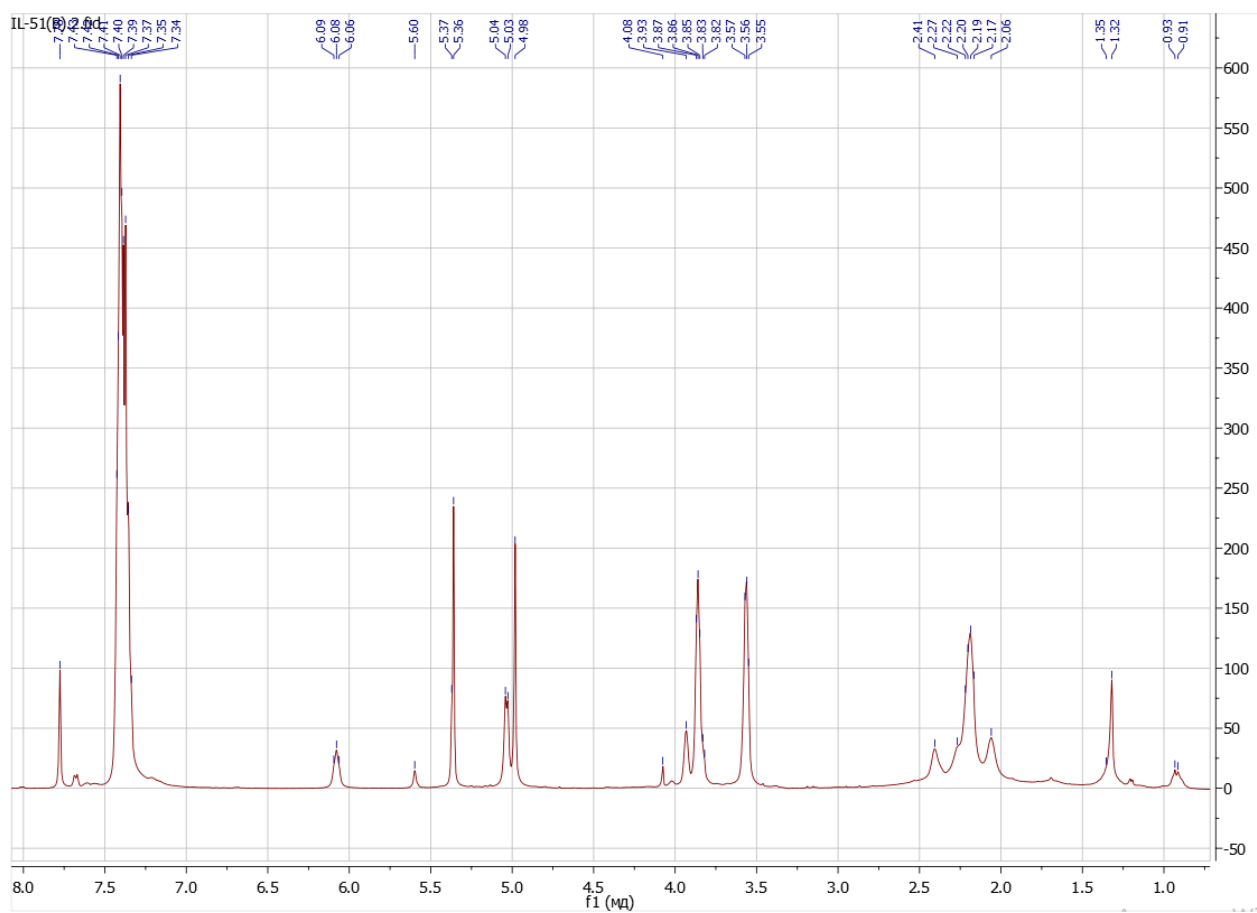

**Figure S18.**  $^1\text{H}$  NMR spectrum of the carboranoclathrochelate  $\text{FeBd}_2(\text{MorphGmSpCarb})(\text{BF})_2$  (400.13 MHz,  $\text{CD}_2\text{Cl}_2$ ,  $20^\circ\text{C}$ ).

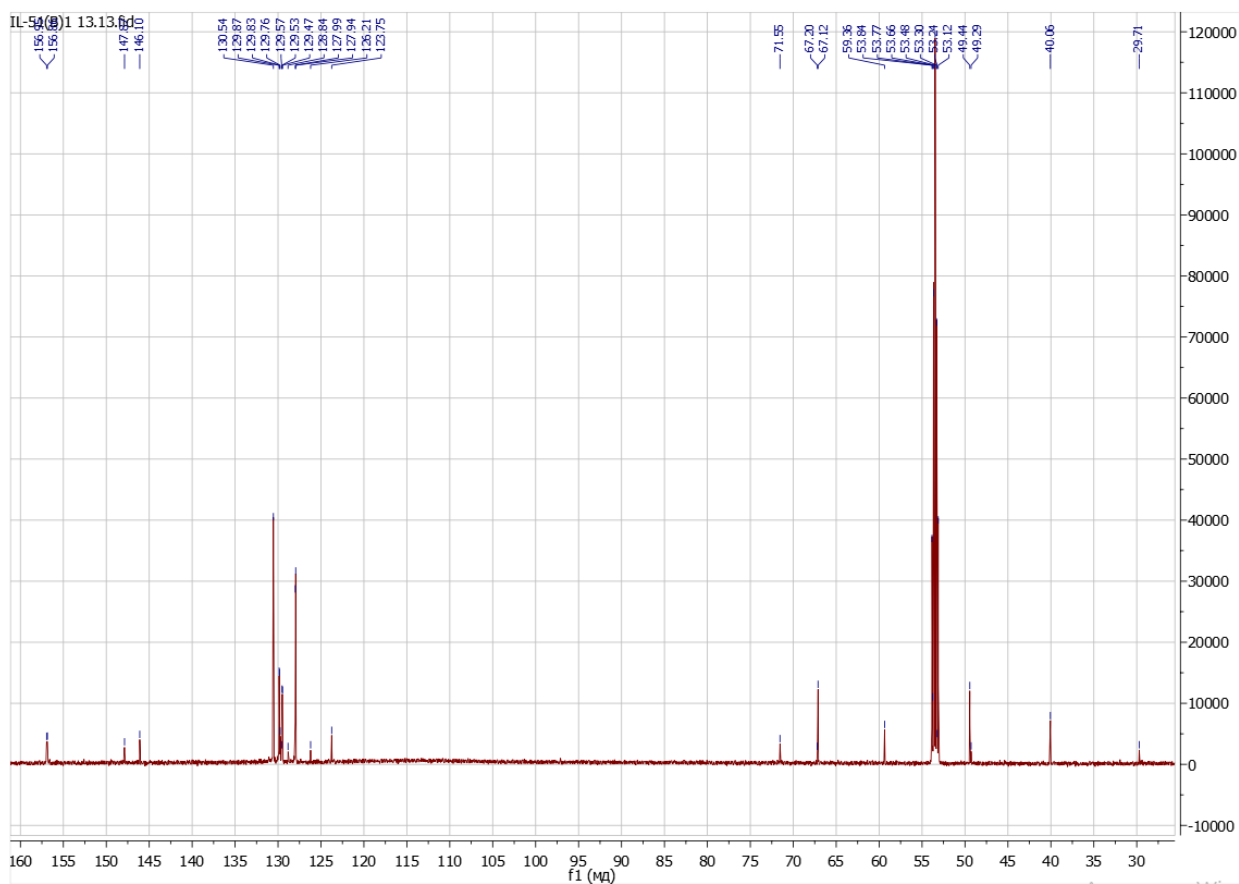

**Figure S19.**  $^{13}\text{C}\{^1\text{H}\}$  NMR spectrum of the carboranocathrocholate  $\text{FeBd}_2(\text{MorphGmSpCarb})(\text{BF})_2$  (400.13 MHz,  $\text{CD}_2\text{Cl}_2$ , 20°C).

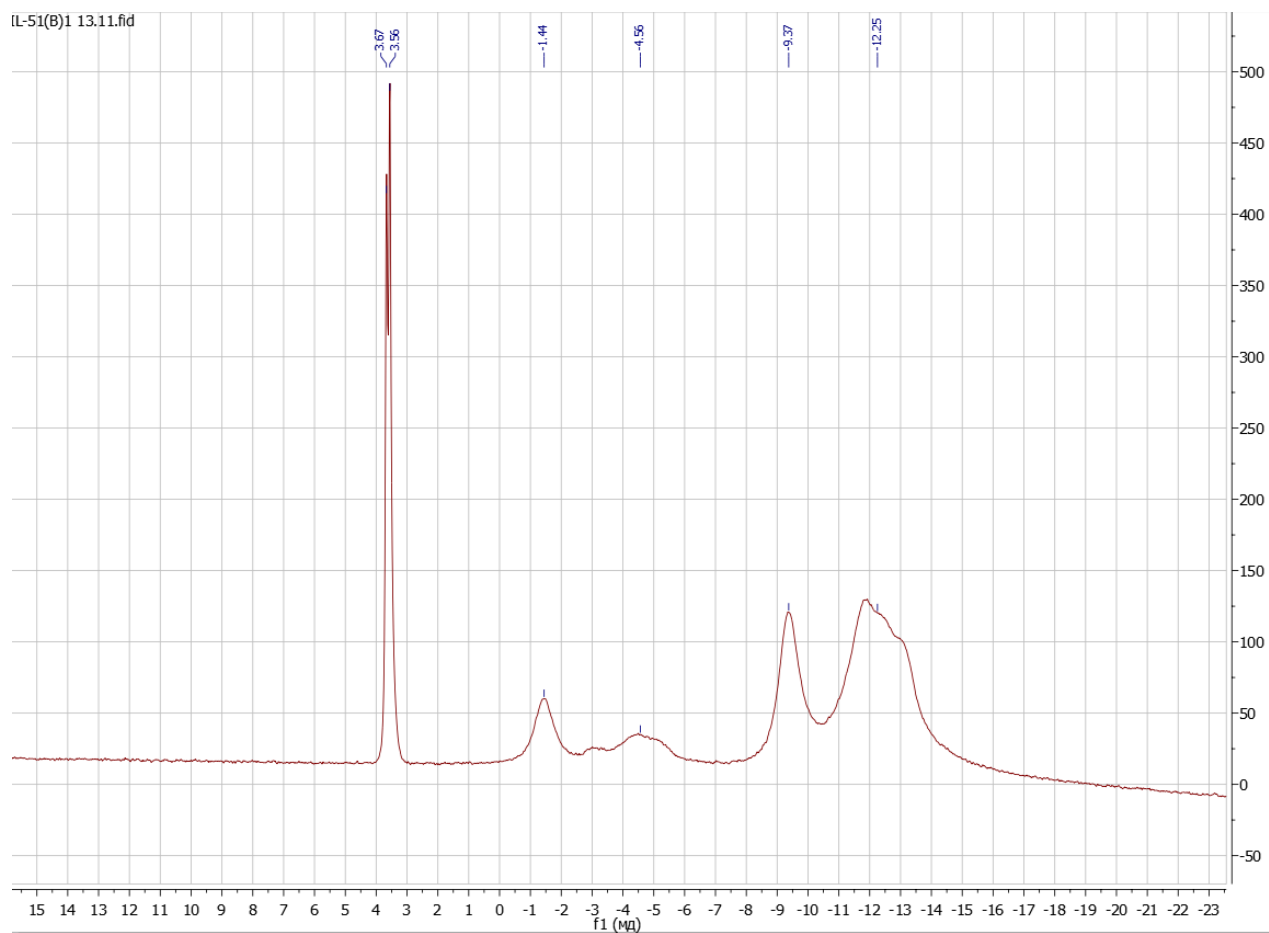

**Figure S20.** Fragment of  $^{11}\text{B}$  NMR spectrum of the carboranoclathrochelate  $\text{FeBd}_2(\text{MorphGmSpCarb})(\text{BF})_2$  (400.13 MHz,  $\text{CD}_2\text{Cl}_2$ ,  $20^\circ\text{C}$ ).

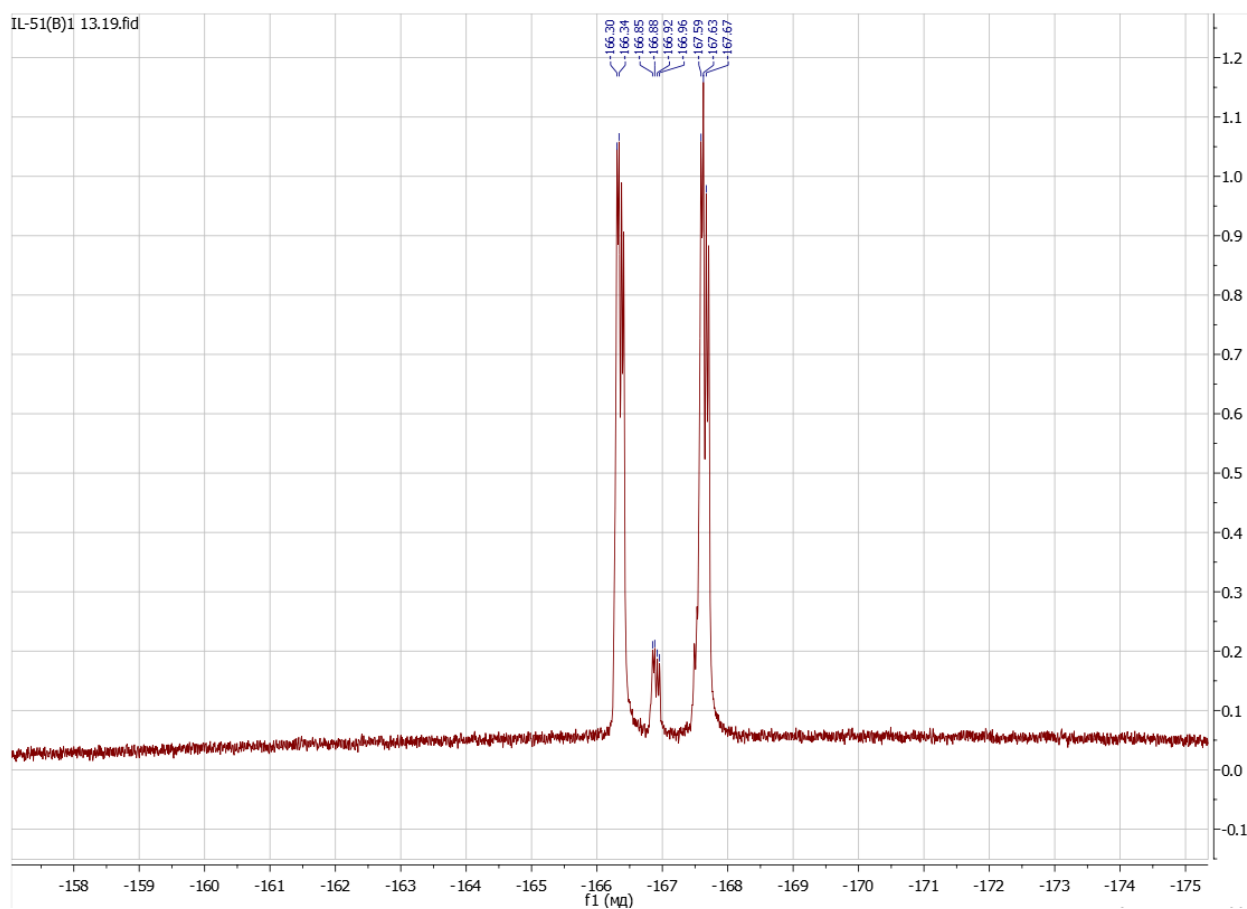

**Figure S21.**  $^{19}\text{F}$  NMR spectrum of the carboranoclathrochelate  $\text{FeBd}_2(\text{MorphGmSpCarb})(\text{BF})_2$  (400.13 MHz,  $\text{CD}_2\text{Cl}_2$ ,  $20^\circ\text{C}$ ).

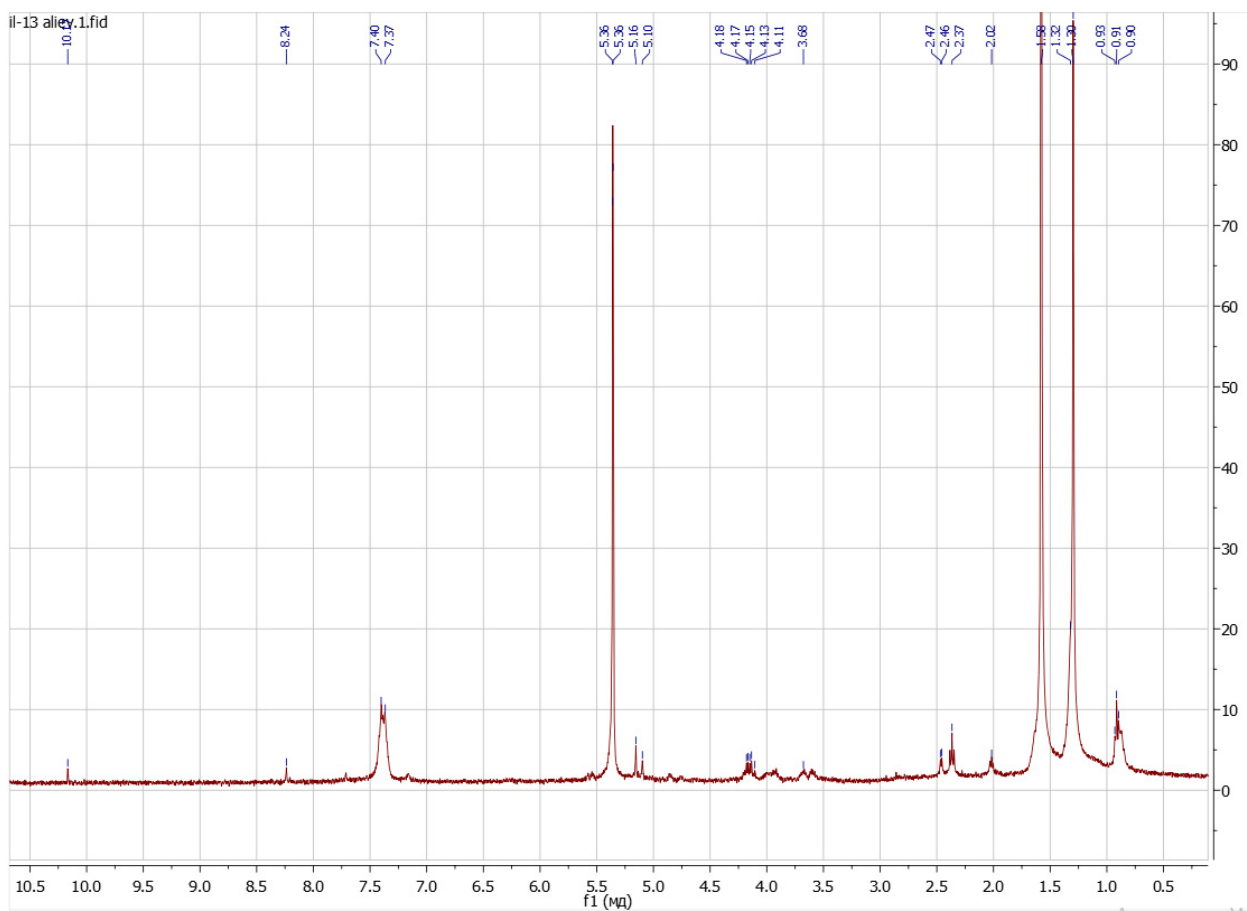

**Figure S22.**  $^1\text{H}$  NMR spectrum of the carboranoclathrochelate  $\text{FeBd}_2(\text{Gm}(\text{SpCarb})_2)(\text{BF})_2$  (400.13 MHz,  $\text{CD}_2\text{Cl}_2$ , 20°C).

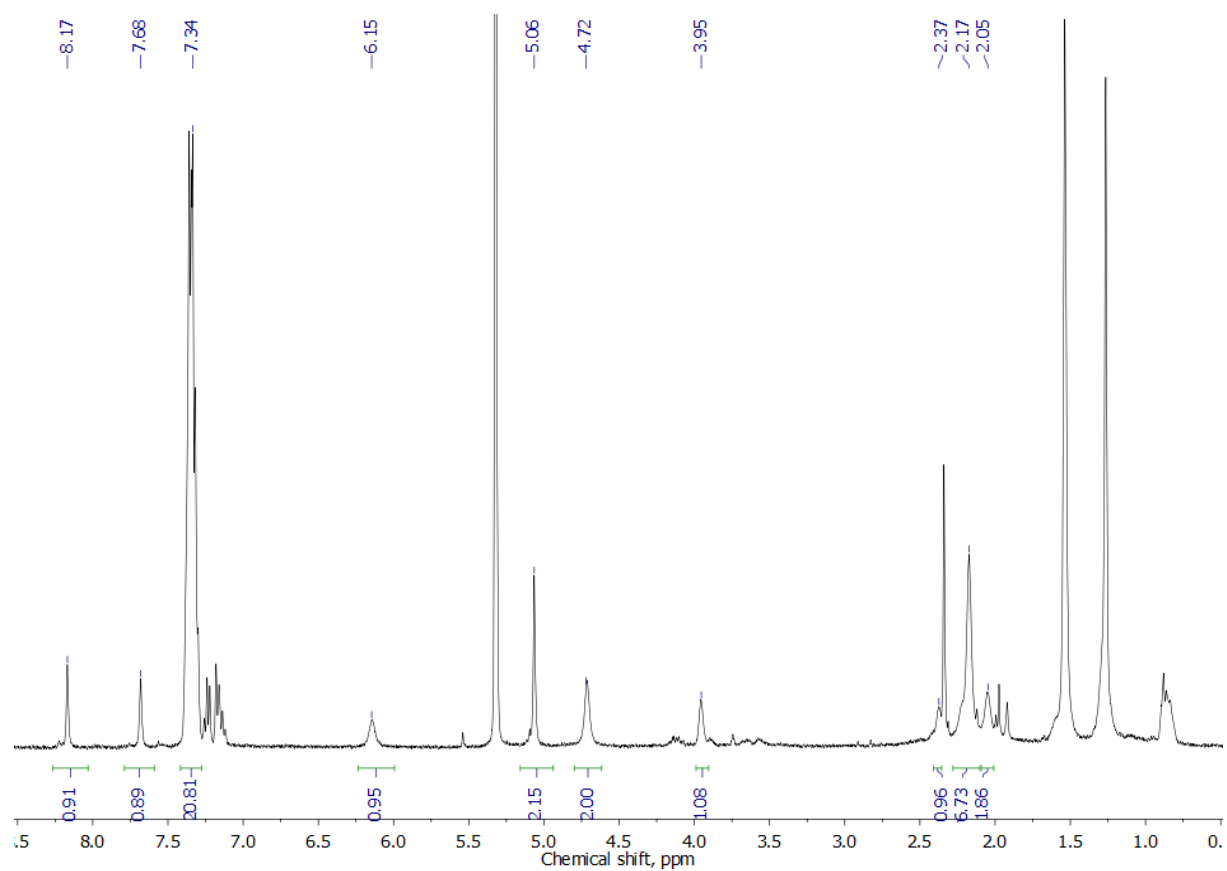

**Figure S23.**  $^1\text{H}\{^{11}\text{B}\}$  NMR spectrum of the carboranoclathrochelate  $\text{FeBd}_2(\text{HGmSpCarb})(\text{BF})_2$  (400.13 MHz,  $\text{CD}_2\text{Cl}_2$ ,  $20^\circ\text{C}$ )



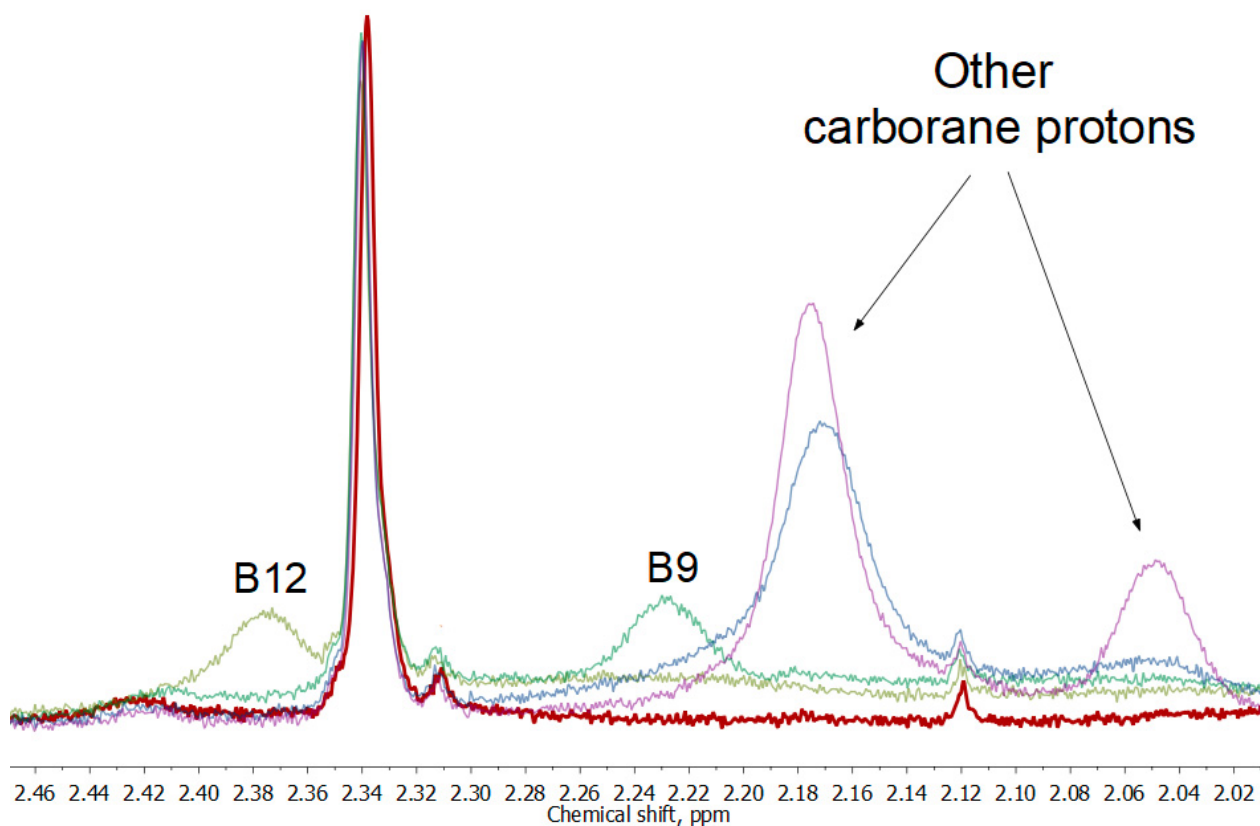

**Figure S24.**  $^1\text{H}$  and  $^1\text{H}$  selective  $^{11}\text{B}$ -decoupled NMR spectra of the carboranoclathrochelate  $\text{FeBd}_2(\text{HGmSpCarb})(\text{BF})_2$ . The bold maroon line shows its  $^1\text{H}$  spectrum, other lines show the  $^1\text{H}$  selective  $^{11}\text{B}$ -decoupled spectra (yellow –  $\delta(^{11}\text{B}) = -1.34$  ppm; green –  $\delta(^{11}\text{B}) = -4.44$  ppm; blue –  $\delta(^{11}\text{B}) = -9.39$  ppm; purple –  $\delta(^{11}\text{B}) = -11.80$  ppm;).

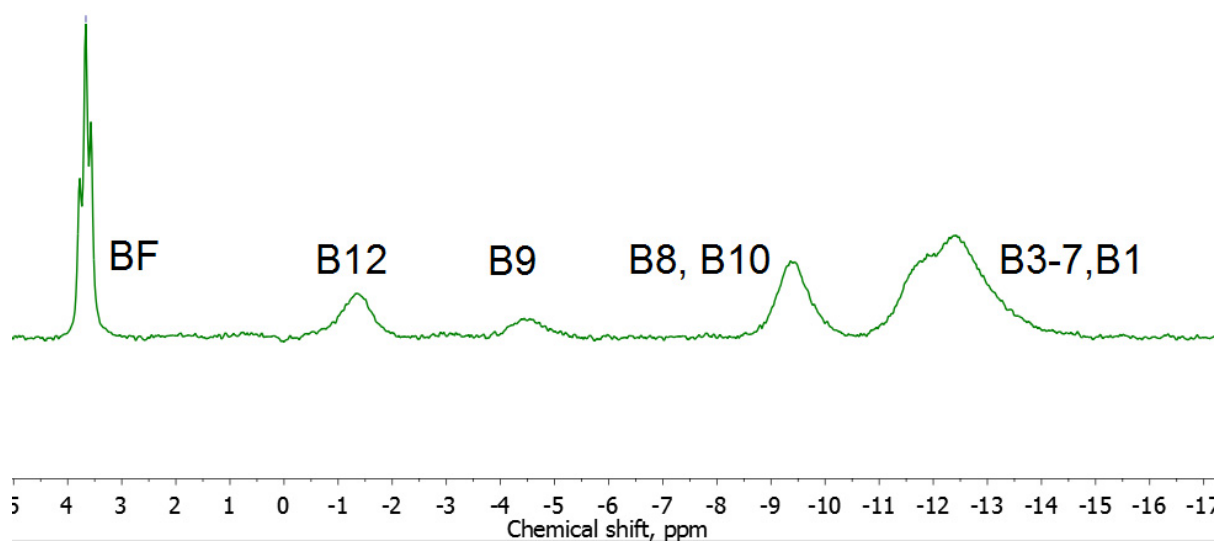

**Figure S25.**  $^{11}\text{B}\{^1\text{H}\}$  NMR spectrum of the carboranoclathrocholate  $\text{FeBd}_2(\text{HGmSpCarb})(\text{BF})_2$ .

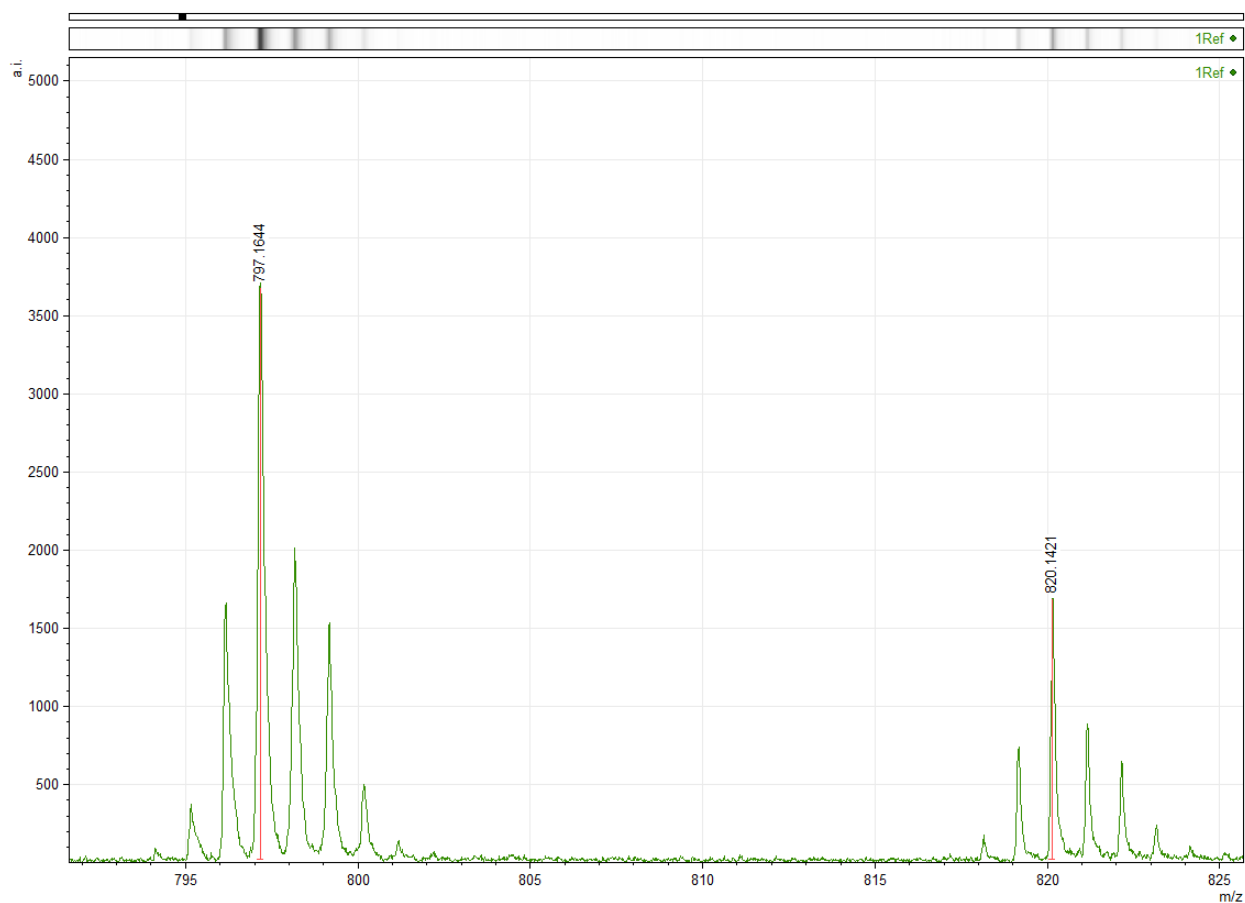

**Figure S26.** Fragment of MALDI-TOF spectrum of the clathrochelate precursor  $\text{FeBd}_2(\text{ClGmMorph})(\text{BF})_2$ .

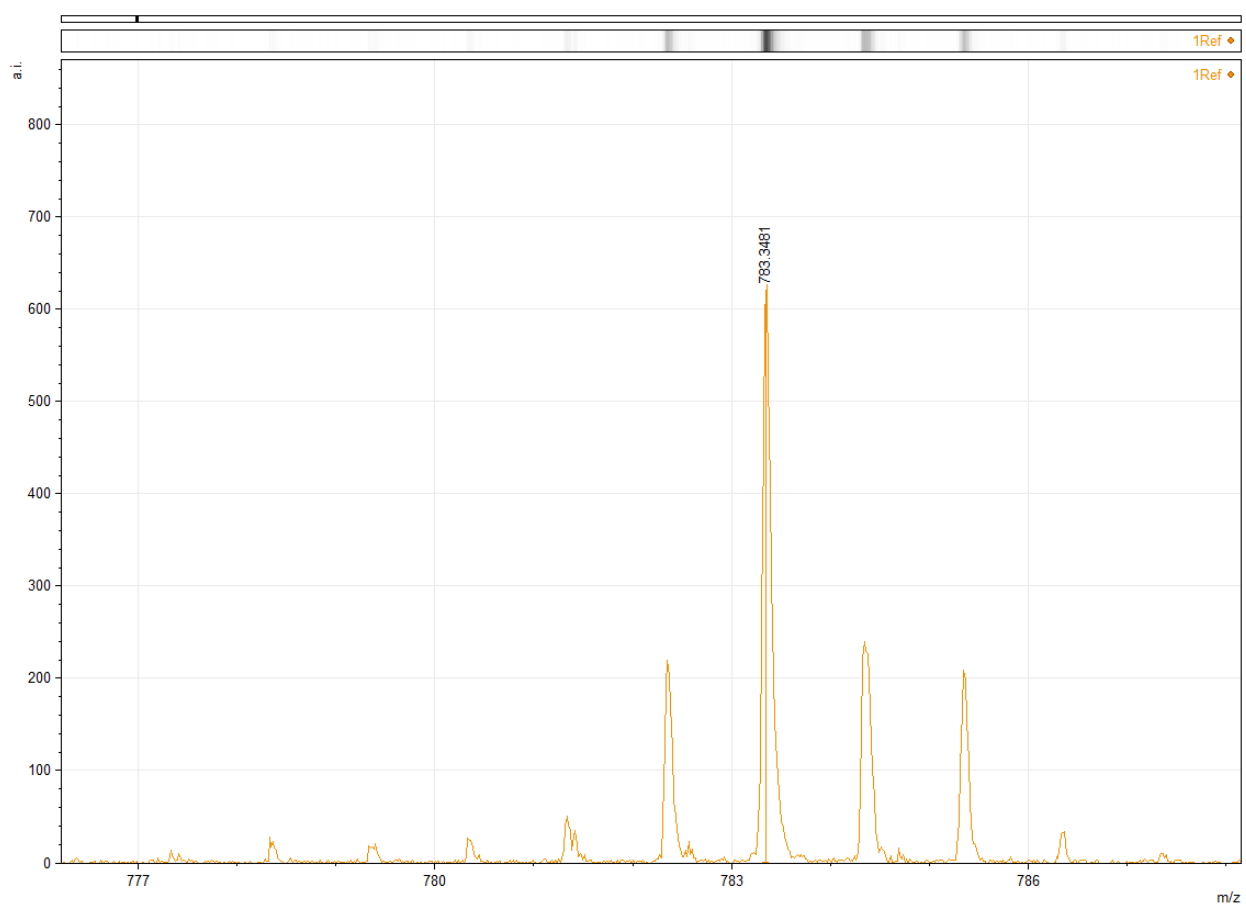

**Figure S27.** Fragment of MALDI-TOF spectrum of the clathrochelate precursor  $\text{FeBd}_2(\text{ClGmDea})(\text{BF})_2$ .

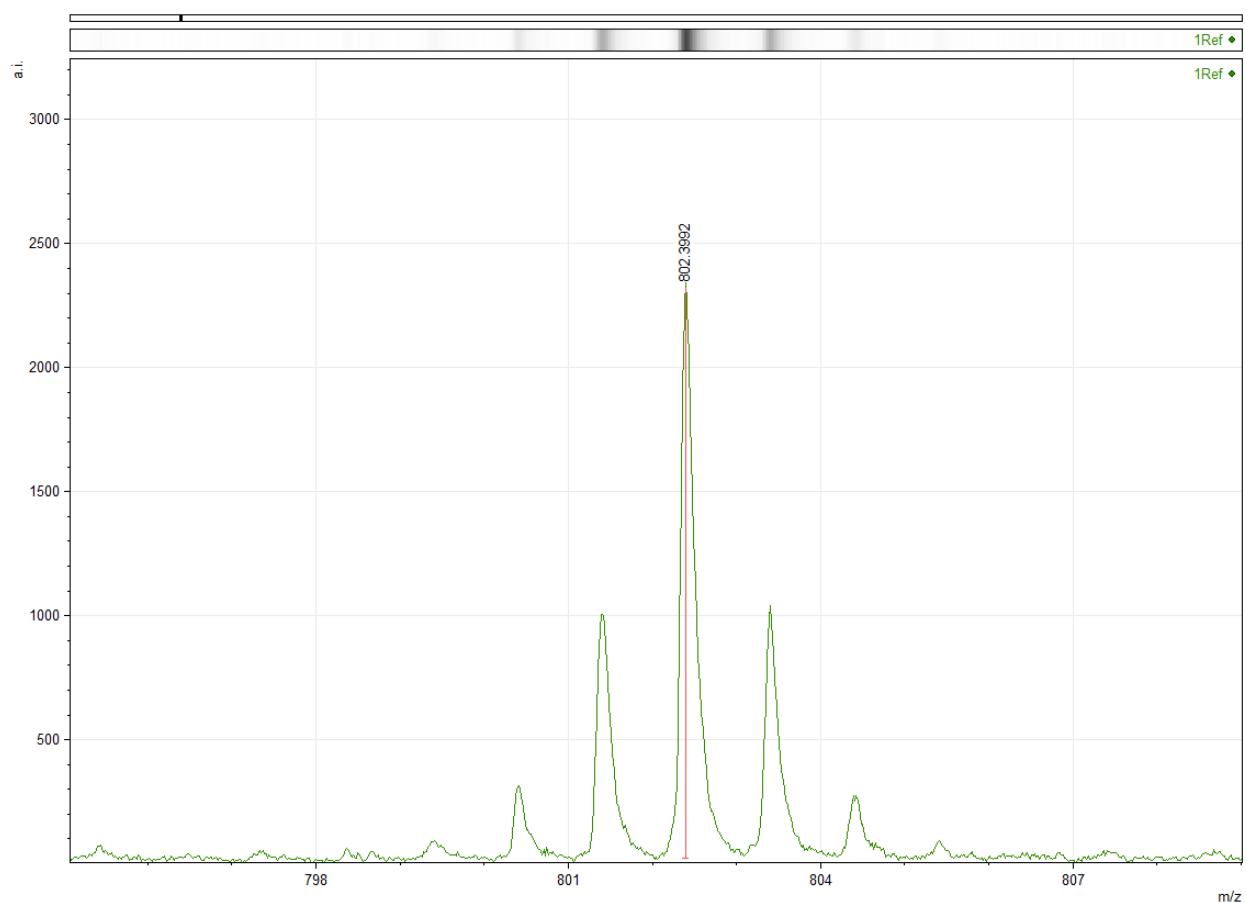

**Figure S28.** Fragment of MALDI-TOF spectrum of the clathrochelate  $\text{FeBd}_2(\text{PropGmDea})(\text{BF})_2$ .

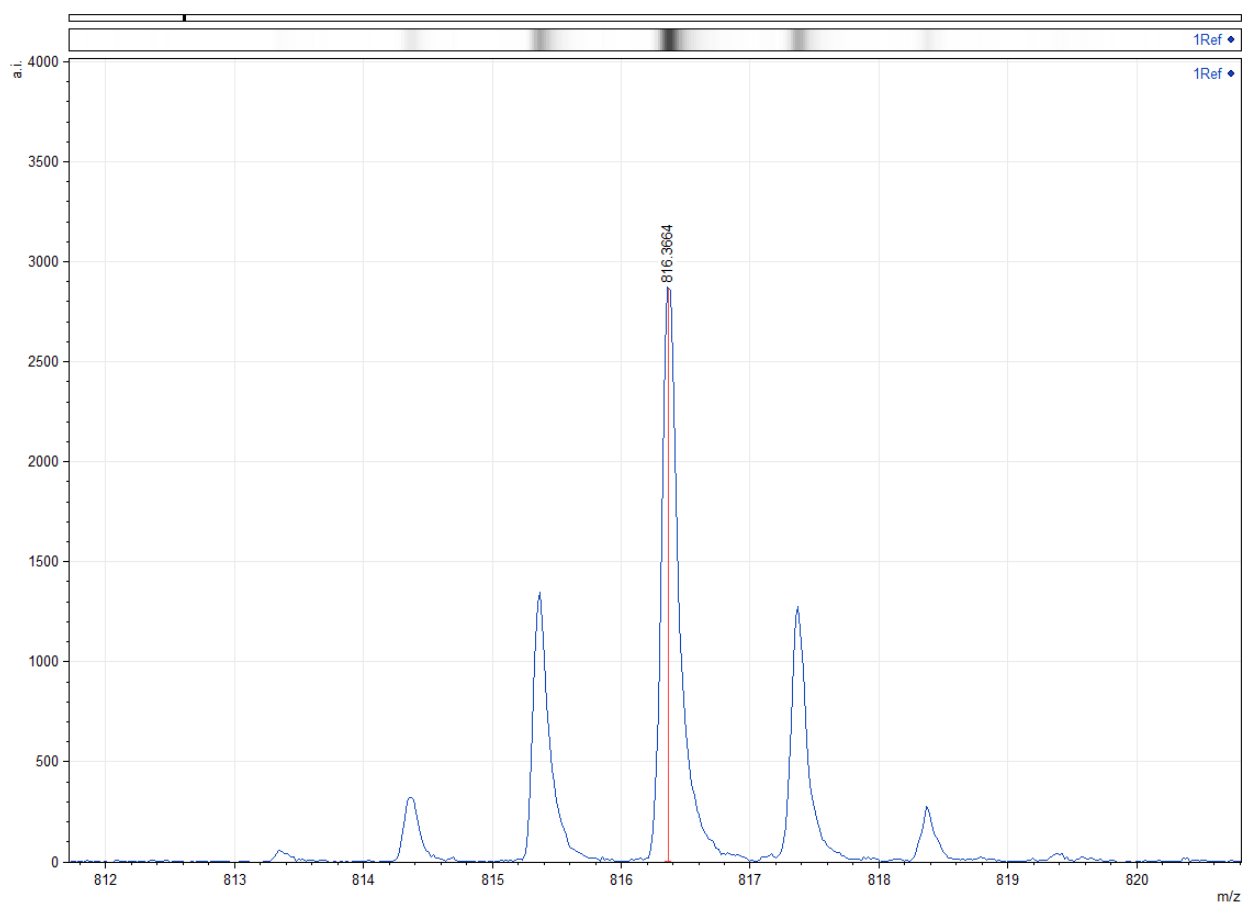

**Figure S29.** Fragment of MALDI-TOF spectrum of the clathrochelate  $\text{FeBd}_2(\text{PropGmMorph})(\text{BF})_2$ .

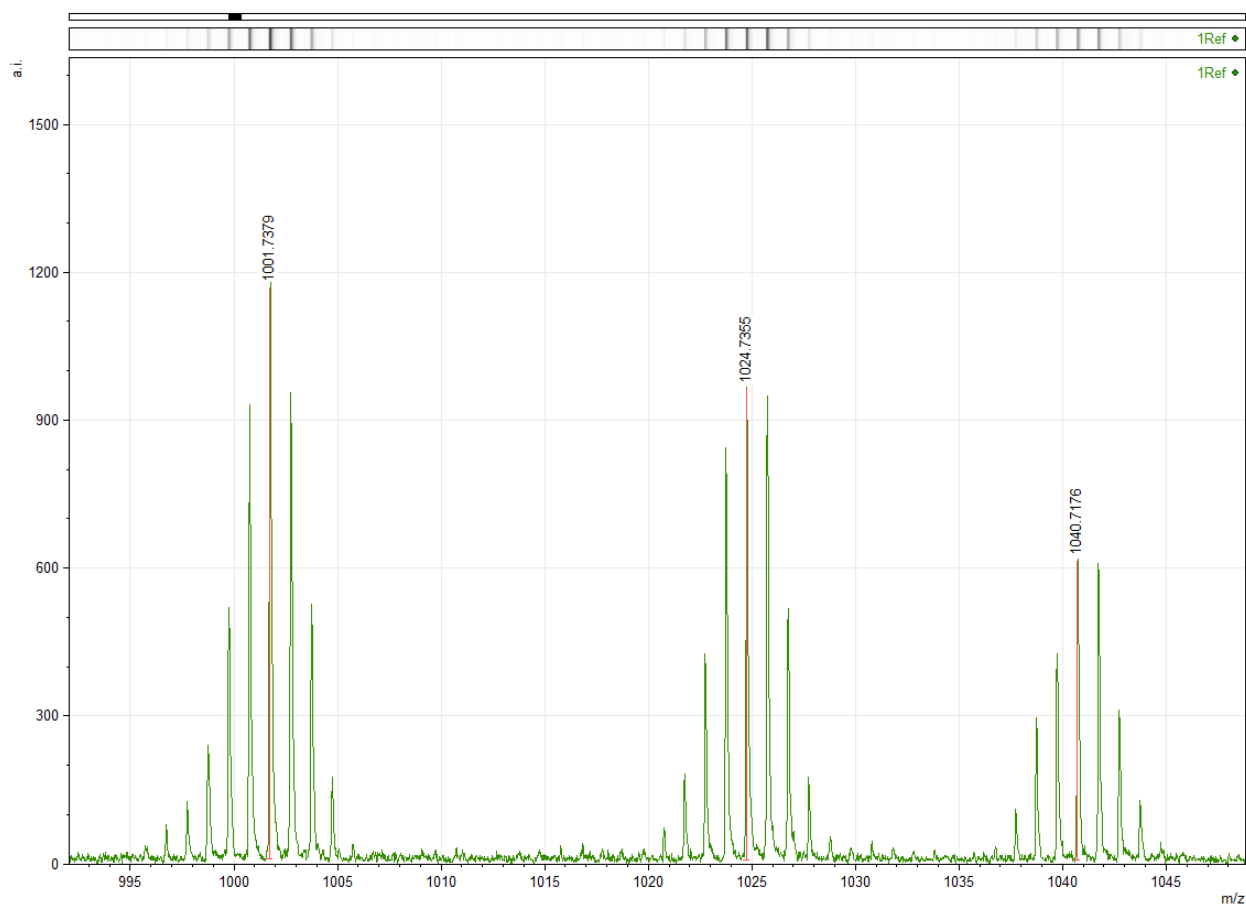

**Figure S30.** Fragment of MALDI-TOF spectrum of the carboranoclathrochelate  $\text{FeBd}_2(\text{DeaGmSpCarb})(\text{BF})_2$ .

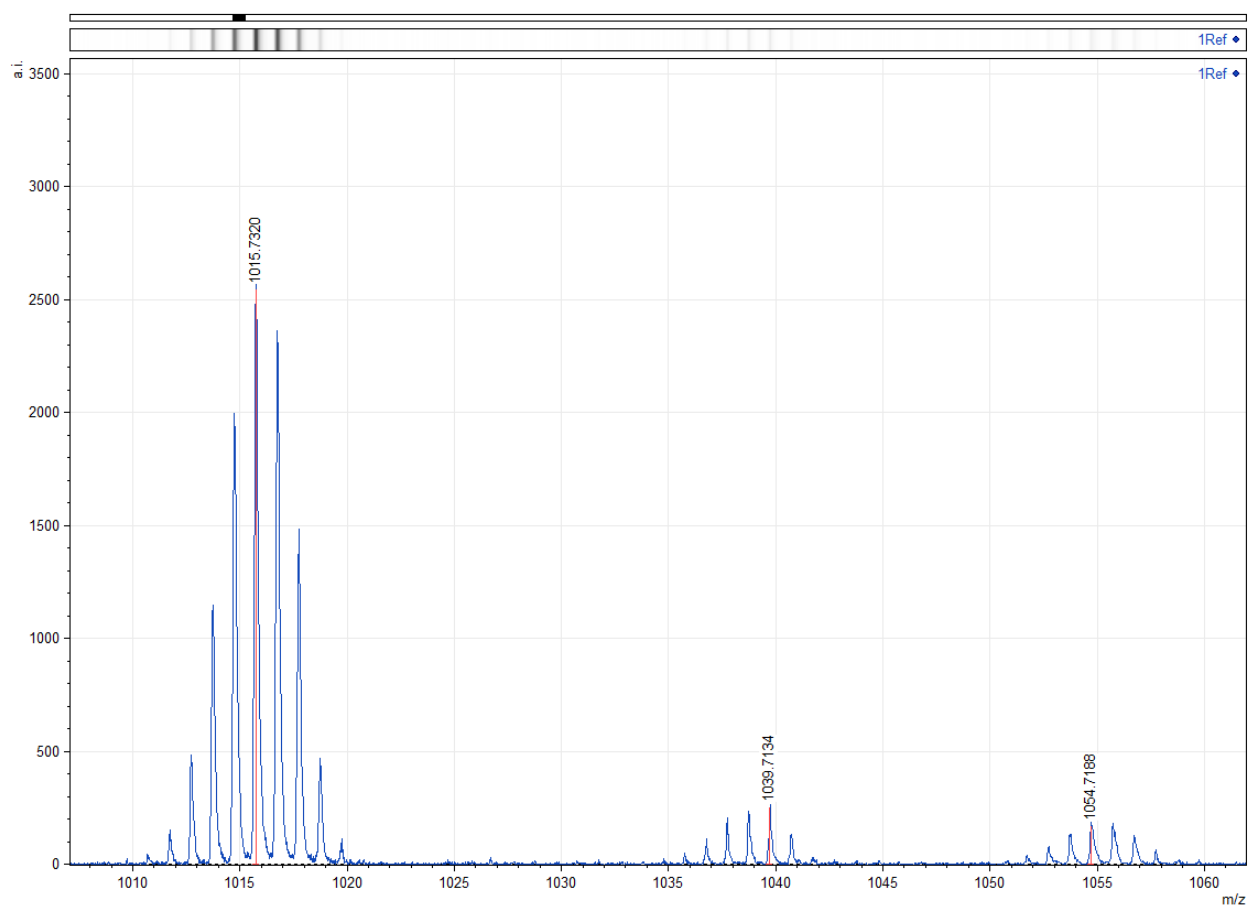

**Figure S31.** Fragment of MALDI-TOF spectrum of the carboranoclathrochelate  $\text{FeBd}_2(\text{MorphGmSpCarb})(\text{BF})_2$ .



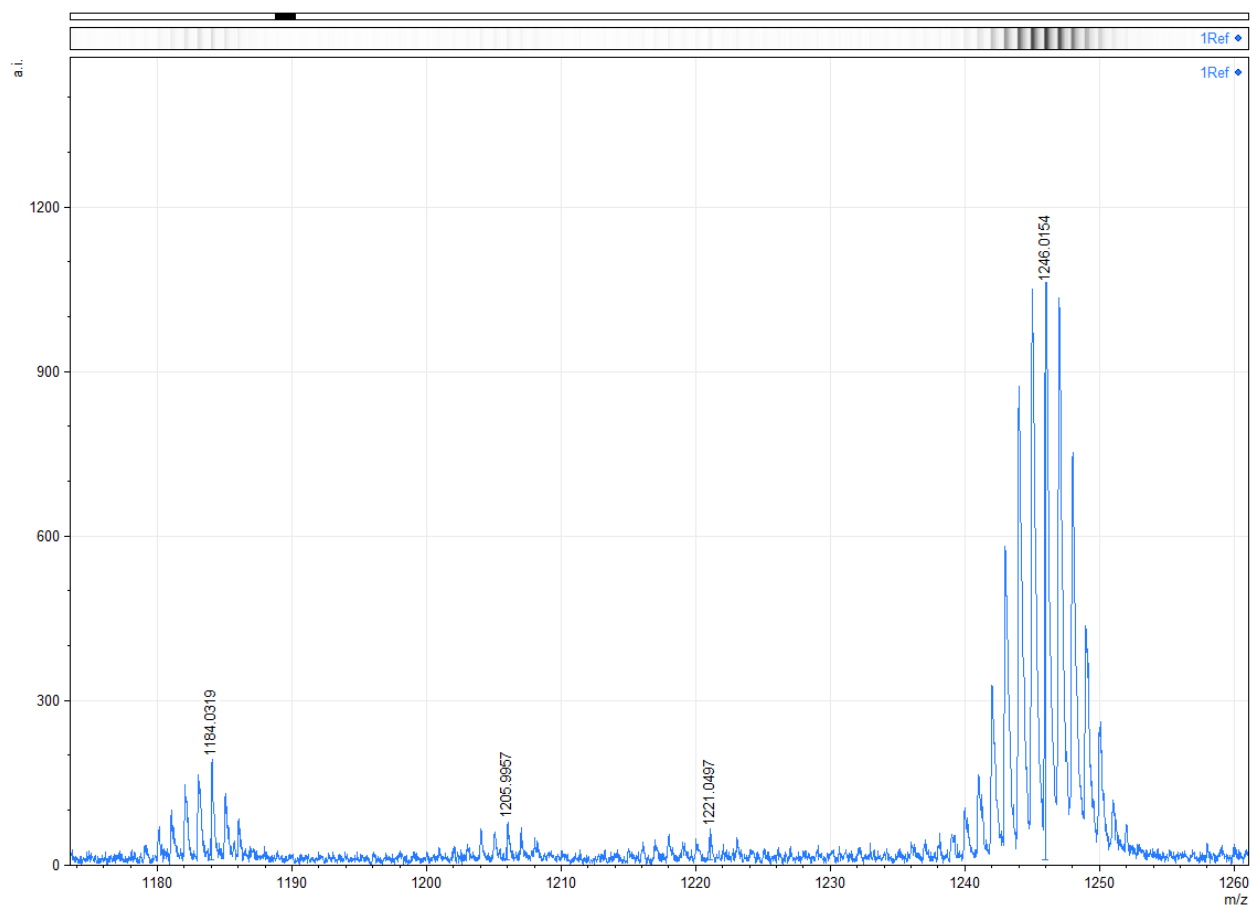

**Figure S32.** Fragment of MALDI-TOF spectrum of the dicarboranoclathrocholate  $\text{FeBd}_2(\text{Gm}(\text{SpCarb})_2)(\text{BF})_2$ .

**Table S1.** Maxima (nm) and intensities ( $\varepsilon \cdot 10^{-3}$ ,  $\text{mol}^{-1} \text{l cm}^3$ ) of the bands in the UV-vis spectra of the dichloromethane solutions of the iron(II) complexes under study and those in the spectrum of THF solution of its organic carborane-based analog

| Compound                                                      | $\lambda_1$ | $\lambda_2$ | $\lambda_3$ | $\lambda_4$ | $\lambda_5$ | $\lambda_6$ | $\lambda_7$ | $\lambda_8$ | $\lambda_9$ | $\lambda_{10}$ | $\lambda_{11}$ |
|---------------------------------------------------------------|-------------|-------------|-------------|-------------|-------------|-------------|-------------|-------------|-------------|----------------|----------------|
| $\text{FeBd}_2(\text{Cl}_2\text{Gm})(\text{BF})_2$            | 264(14)     | 285(7.7)    | 311(3.6)    | 399(3.2)    | 448(3.5)    | 470(19)     |             |             |             |                |                |
| $\text{FeBd}_2(\text{ClGmMorph})(\text{BF})_2$                | 240(24)     | 264(3.4)    | 279(18)     | 288(3.8)    | 342(3.1)    | 415(1.7)    | 477(17)     | 503(4.2)    |             |                |                |
| $\text{FeBd}_2(\text{ClGmDea})(\text{BF})_2$                  | 242(31)     | 265(4.0)    | 287(1.5)    | 288(16)     | 337(3.8)    | 416(2.1)    | 481(24)     | 543(1.7)    |             |                |                |
| $\text{FeBd}_2(\text{PropGmDea})(\text{BF})_2$                | 243(31)     | 295(18)     | 338(2.1)    | 379(5.0)    | 434(5.1)    | 498(19)     | 525(1.8)    | 557(1.9)    |             |                |                |
| $\text{FeBd}_2(\text{PropGmMorph})(\text{BF})_2$              | 237(24)     | 251(0.6)    | 278(20)     | 298(3.8)    | 361(3.3)    | 387(22)     | 429(6.9)    | 499(21)     | 528(1.0)    | 563(1.7)       |                |
| $\text{FeBd}_2((\text{PropNH})_2\text{Gm})(\text{BF})_2$      | 249(31)     | 294(16)     | 339(5.1)    | 381(1.8)    | 432(6.2)    | 491(17)     | 523(8.0)    |             |             |                |                |
| $\text{FeBd}_2(\text{HGmProp})(\text{BF})_2$ [25]             | 251(24)     | 278(14)     | 292(9.3)    | 335(3.3)    | 390(2.8)    | 470(24)     | 504(8.7)    |             |             |                |                |
| $\text{FeBd}_2(\text{DeaGmSpCarb})(\text{BF})_2$              | 241(29)     | 270(0.8)    | 292(14)     | 338(3.9)    | 385(0.5)    | 435(2.4)    | 489(7.0)    | 498(10)     | 524(2.9)    |                |                |
| $\text{FeBd}_2(\text{MorphGmSpCarb})(\text{BF})_2$            | 243(28)     | 270(0.5)    | 295(11)     | 313(4.1)    | 382(0.9)    | 433(1.3)    | 474(7.5)    | 501(12)     | 525(1.3)    |                |                |
| $\text{FeBd}_2(\text{Gm}(\text{SpCarb})_2)(\text{BF})_2$      | 240(24)     | 281(16)     | 365(6.5)    | 433(1.6)    | 466(1.8)    | 515(13)     | 616(1.6)    |             |             |                |                |
| $\text{FeBd}_2(\text{HGmSpCarb})(\text{BF})_2$ [25]           | 244(35)     | 265(1.0)    | 286(2.1)    | 295(3.5)    | 308(3.3)    | 336(0.5)    | 362(4.0)    | 479(24)     | 581(0.6)    |                |                |
| 1-[( <i>o</i> -carboran-1'-yl)methyl]-4-pentyl-1,2,3-triazole | 220(3.7)    | 264(0.08)   |             |             |             |             |             |             |             |                |                |
